# Supplementary material
Source: MDPI journal article supplement (https://www.mdpi.com/2227-9717/8/8/962)
Supplement: s1 [file s1]

# Rapid TLC with Densitometry for Evaluation of Naproxen Stability

Wioletta Parys\*, Małgorzata Dołowy, Alina Pyka-Pająk

Department of Analytical Chemistry, Faculty of Pharmaceutical Sciences in Sosnowiec, Medical University of Silesia in Katowice, Jagiellońska 4, 41-200 Sosnowiec, Poland, mdolowy@sum.edu.pl (M.D.); apyka@sum.edu.pl (A.P.-P.)

\* Correspondence: wparys@sum.edu.pl

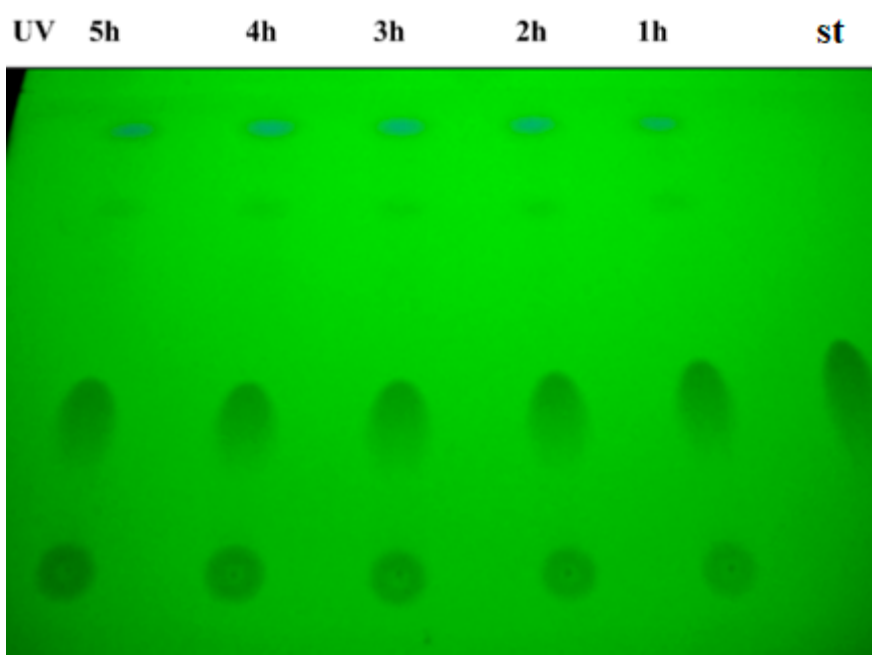

**Fig. S1.** Photograph of naproxen chromatogram that was irradiated with UV radiation at  $\lambda = 254$  nm on silica gel for a period of 1 h, 2 h, 3 h, 4 h, 5 h before developing the chromatographic plate (mobile phase A: TOL - ACE - CHL, 2:5:12 (v/v/v); photo taken at  $\lambda=254$  nm; where st – standard of naproxen (non-irradiated)

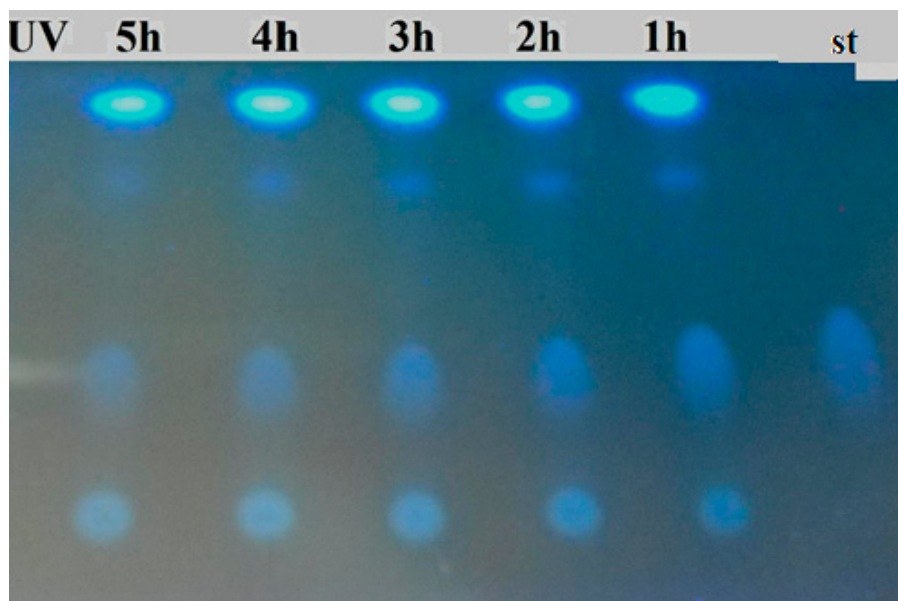

**Fig. S2.** Photograph of naproxen chromatogram that was irradiated with UV radiation at  $\lambda = 254$  nm on silica gel for a period of 1 h, 2 h, 3 h, 4 h, 5 h before developing the chromatographic plate (mobile phase A: TOL - ACE - CHL, 2:5:12 (v/v/v); photo taken under UV light at 366 nm); where st – standard of naproxen (non-irradiated)

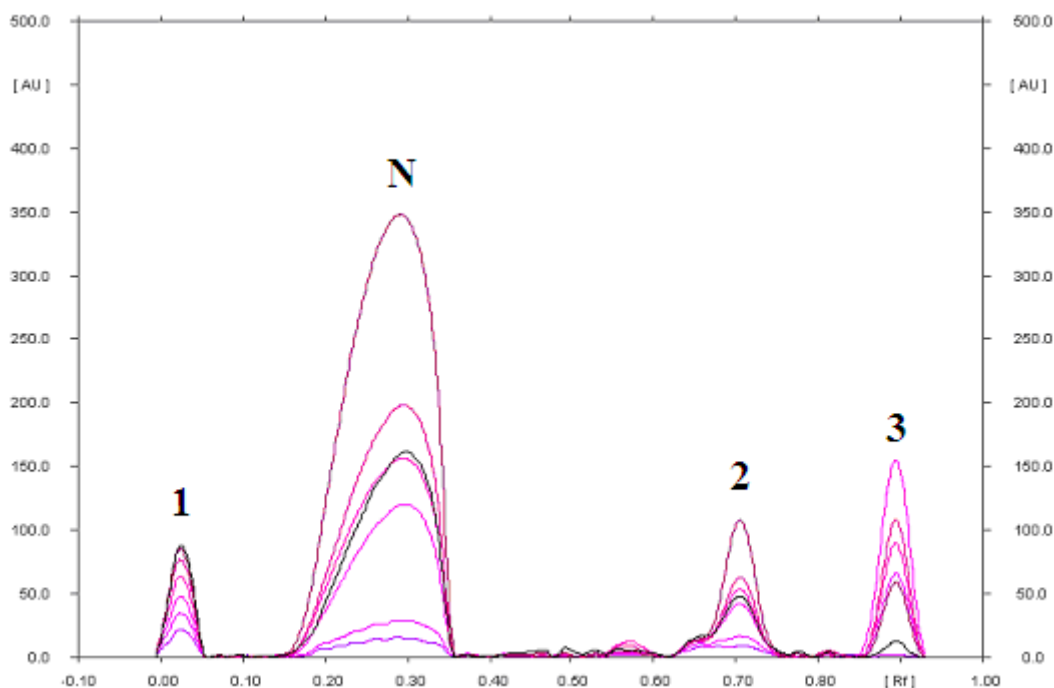

**Fig. S3.** Densitogram of naproxen irradiated on silica gel with UV radiation  $\lambda = 254$  nm for a period of 5 h (mobile phase A: TOL - ACE - CHL, 2:5:12 (v/v/v)).

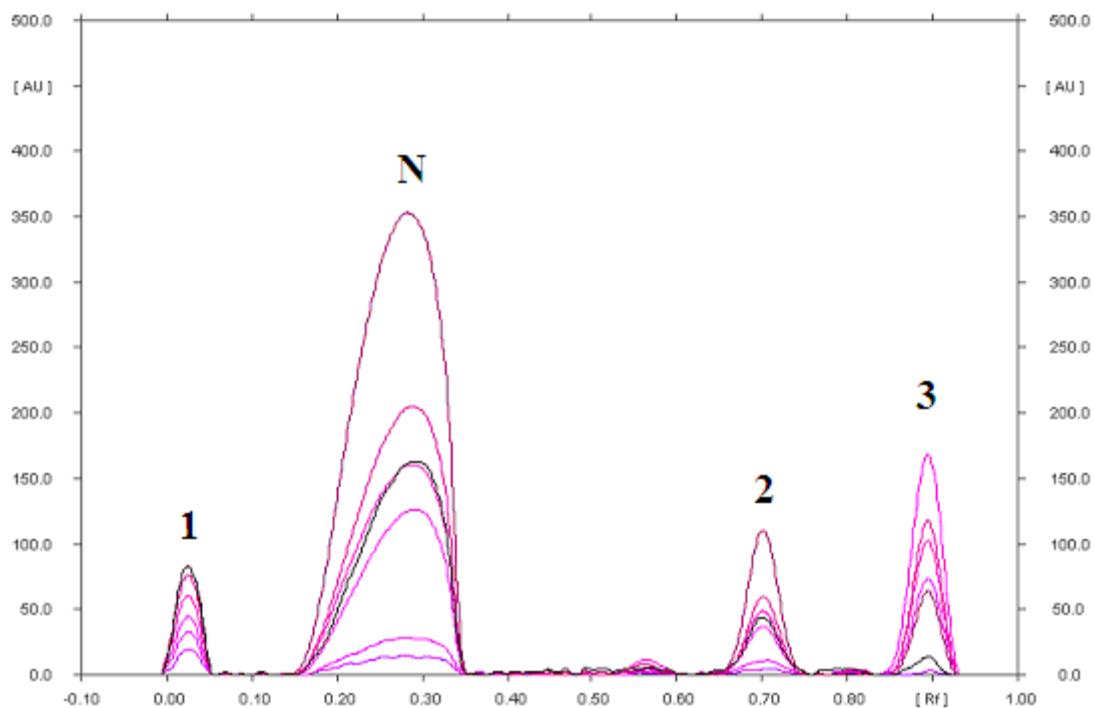

**Fig. S4.** Densitogram of naproxen irradiated on silica gel with UV radiation  $\lambda = 254$  nm for a period of 4 h (mobile phase A: TOL - ACE - CHL, 2:5:12 (v/v/v)).

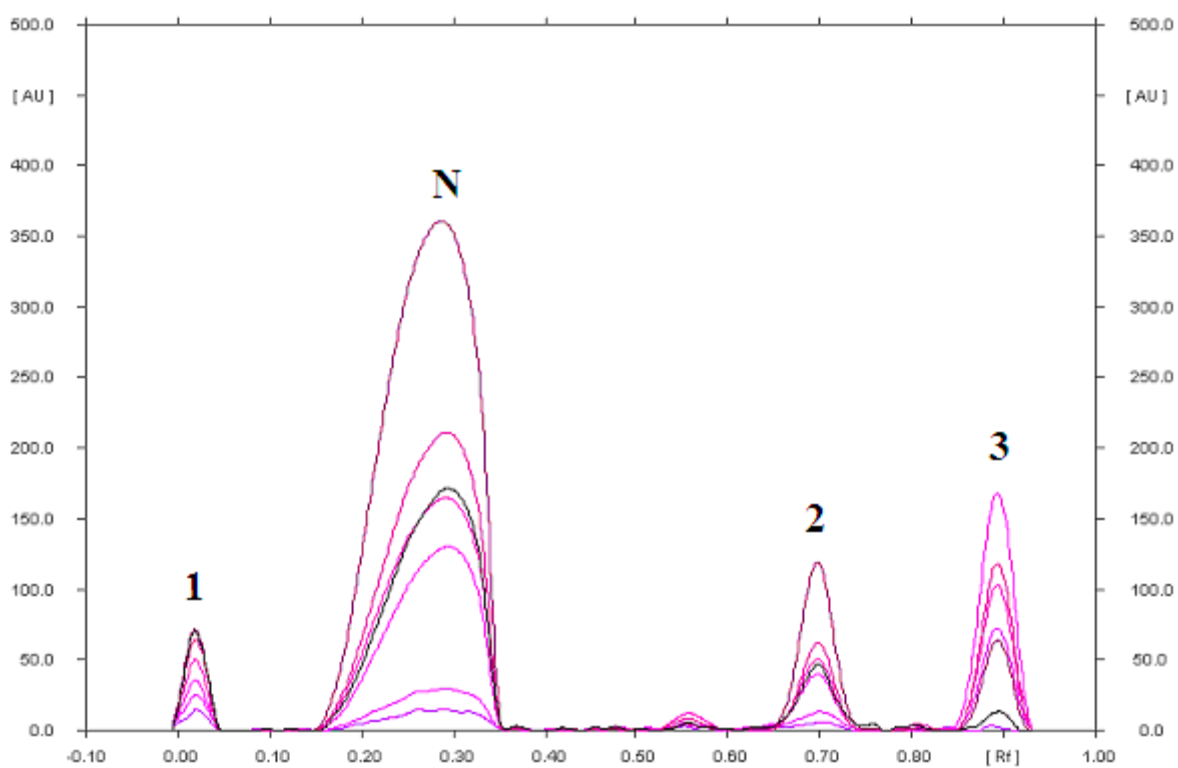

**Fig. S5.** Densitogram of naproxen irradiated on silica gel with UV radiation  $\lambda = 254$  nm for a period of 3 h (mobile phase A: TOL - ACE - CHL, 2:5:12 (v/v/v)).

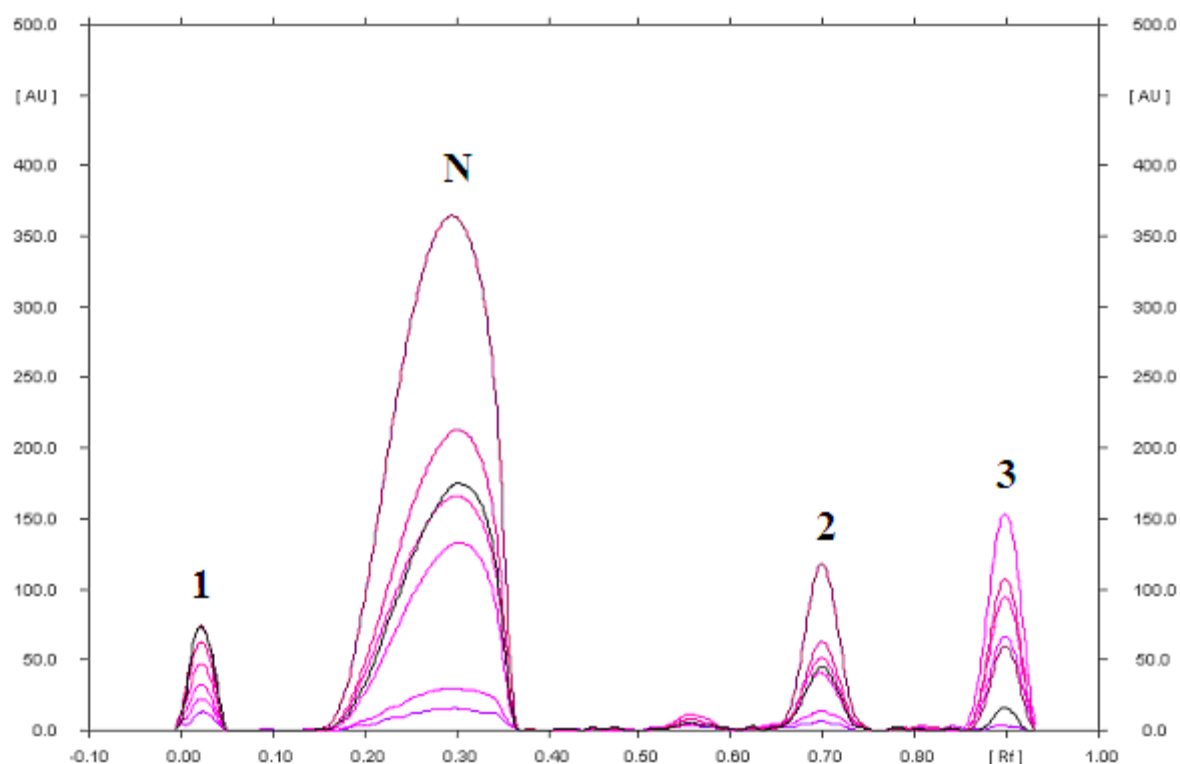

**Fig. S6.** Densitogram of naproxen irradiated on silica gel with UV radiation  $\lambda = 254$  nm for a period of 2 h (mobile phase A: TOL - ACE - CHL, 2:5:12 (v/v/v)).

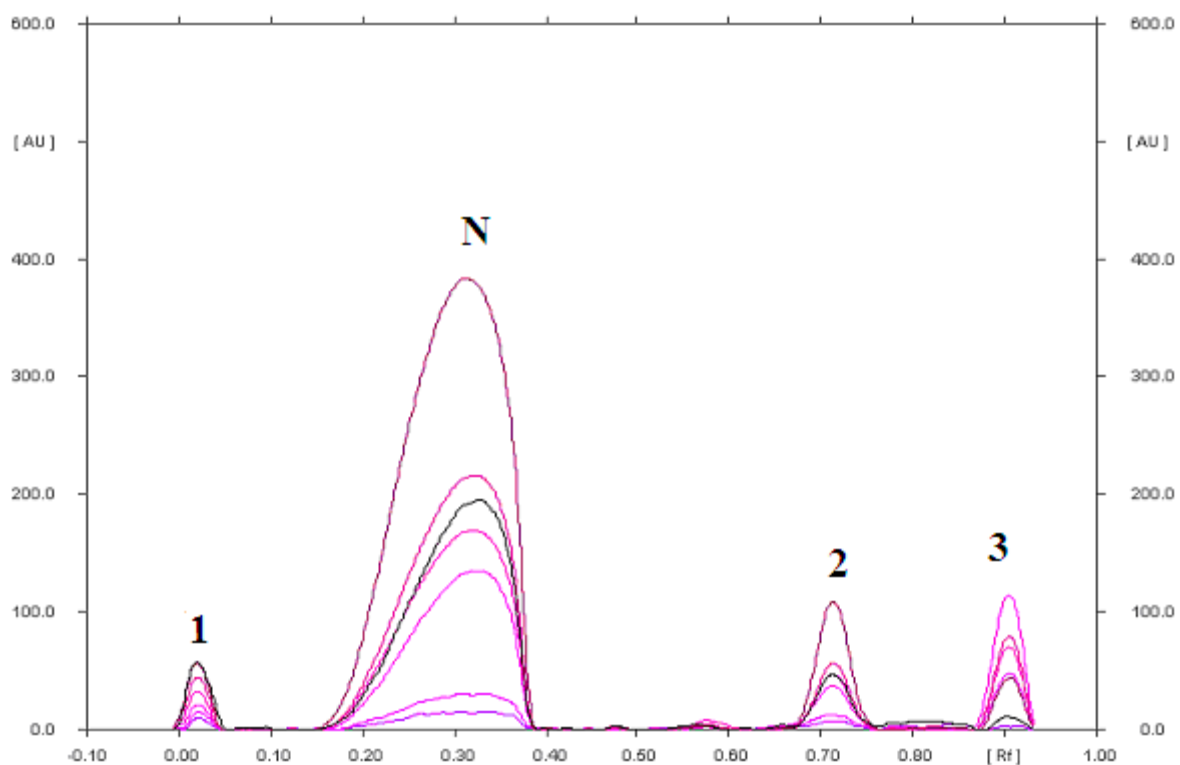

**Fig. S7.** Densitogram of naproxen irradiated on silica gel with UV radiation  $\lambda = 254$  nm for a period of 1 h (mobile phase A: TOL - ACE - CHL, 2:5:12 (v/v/v)).

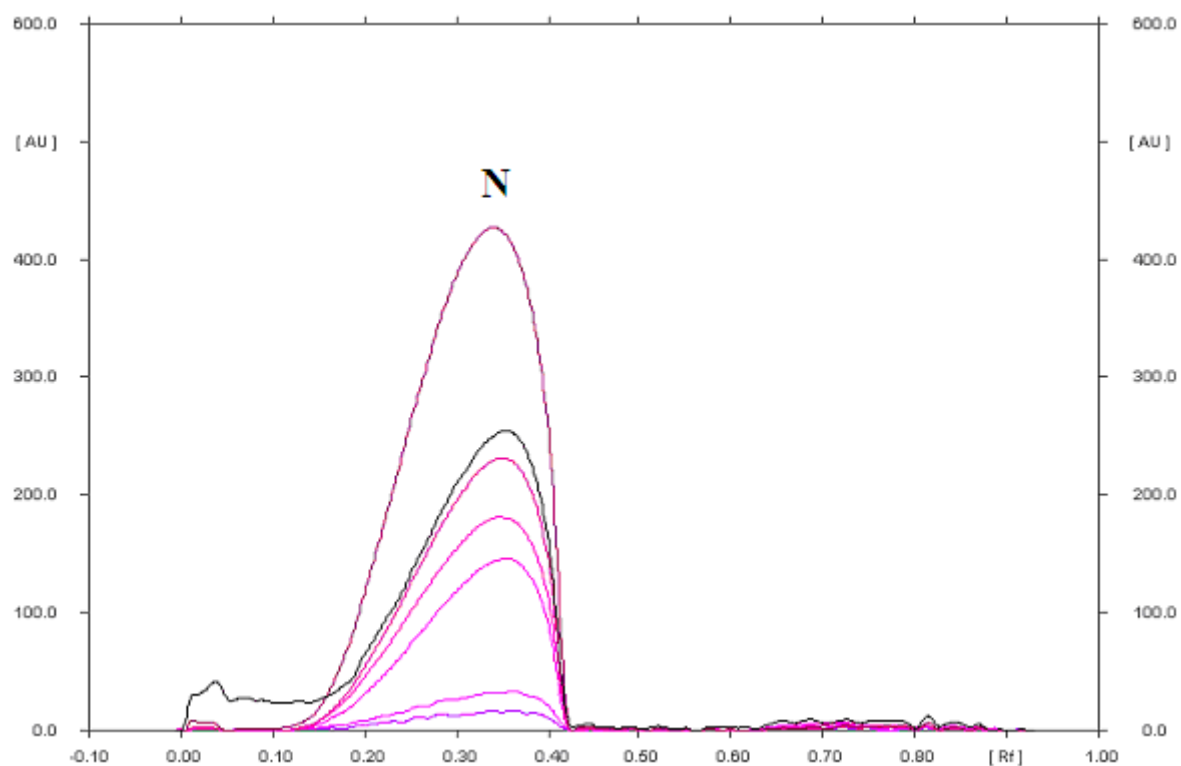

**Fig. S8.** Densitogram of naproxen (non-irradiated) standard (mobile phase A: TOL - ACE - CHL, 2:5:12 (v/v/v)).

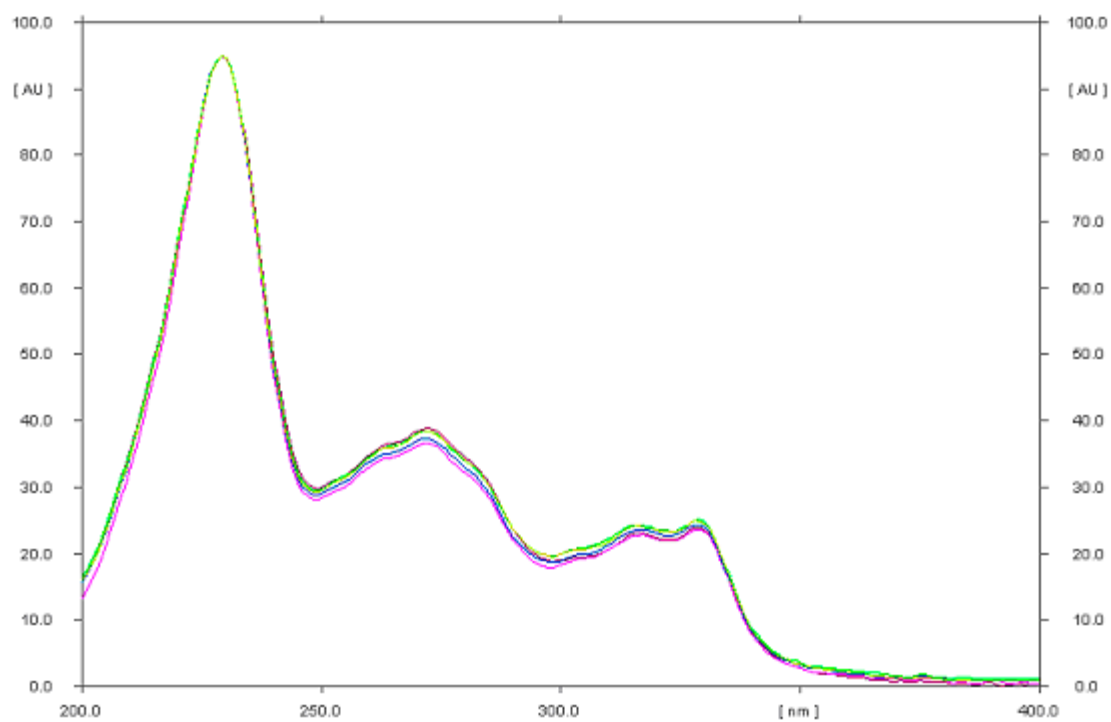

**Fig. S9.** Spectra of naproxen not exposed and irradiated with UV radiation at  $\lambda = 254$  nm for a period of 1 h to 5 h on silica gel (mobile phase A: TOL - ACE - CHL, 2:5:12 v/v/v)).

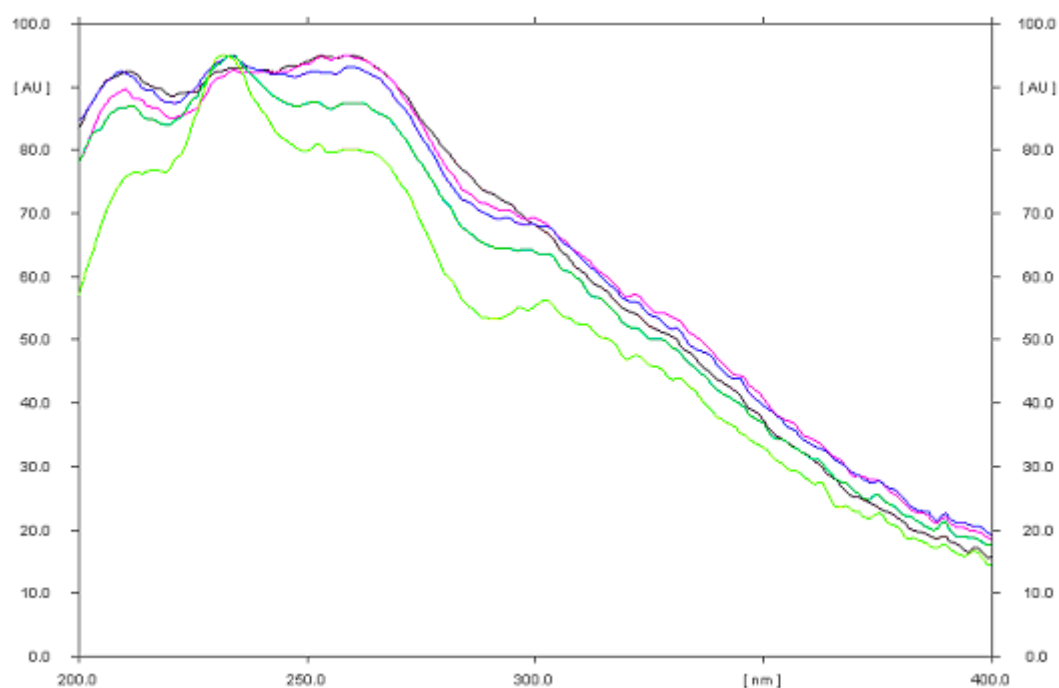

**Fig. S10.** Spectra of substance 1 with the value  $R_F = 0.02$  formed after irradiation with UV light at  $\lambda = 254$  nm naproxen on silica gel for 1 h, 2 h, 3 h, 4 h and 5 h (mobile phase A: TOL - ACE - CHL, 2:5:12 (v/v/v)).

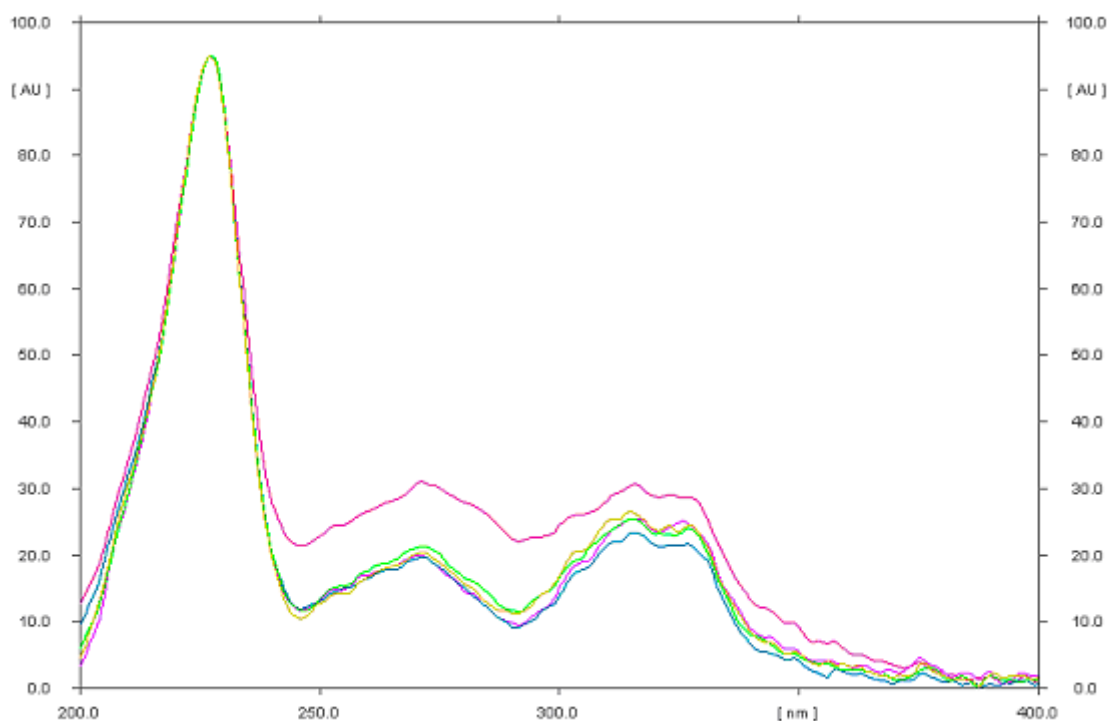

**Fig. S11.** Spectra of substance 2 (naproxen ethyl ester) with the value  $R_F = 0.71$  formed after irradiation with UV light with  $\lambda = 254$  nm naproxen on silica gel for 1 h, 2 h, 3 h, 4 h and 5 h (mobile phase A: TOL - ACE - CHL, 2:5:12 (v/v/v)).

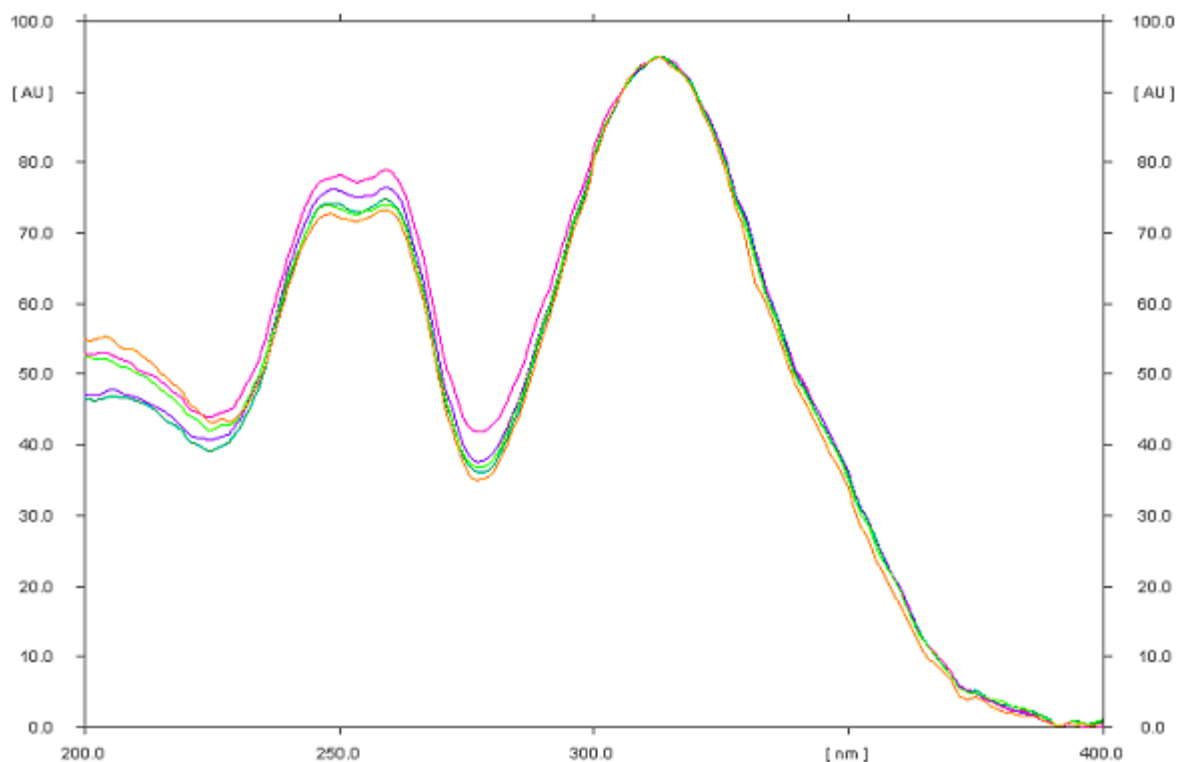

**Fig. S12.** Spectra of substance 3 with the value  $R_F = 0.89$  formed after irradiation with UV light with  $\lambda = 254$  nm naproxen on silica gel for 1 h, 2 h, 3 h, 4 h and 5 h (mobile phase A: TOL - ACE - CHL, 2:5:12 (v/v/v)).

**Table S1.**  $R_F$  values and chromatographic peak areas of naproxen and its chemical transformation products under the influence of UV light (254 nm) on silica gel, after separation using a mobile phase A: TOL - ACE - CHL (2:5:12, v/v/v).

| Exposure time<br>of naproxen on<br>silica gel | Substance <sup>a)</sup> | $R_F$ | Chromatographic<br>peak area<br>[AU] <sup>b)</sup> | %<br>of band area |
|-----------------------------------------------|-------------------------|-------|----------------------------------------------------|-------------------|
| 0 h                                           | N                       | 0.29  | 49298                                              | 100               |
| 1 h                                           | N                       | 0.29  | 36946                                              | 83.47             |
|                                               | S1                      | 0.02  | 842                                                | 1.90              |
|                                               | S2                      | 0.71  | 3290                                               | 7.43              |
|                                               | S3                      | 0.89  | 3187                                               | 7.20              |
| 2 h                                           | N                       | 0.29  | 32965                                              | 77.18             |
|                                               | S1                      | 0.02  | 1206                                               | 2.82              |
|                                               | S2                      | 0.70  | 3814                                               | 8.93              |
|                                               | S3                      | 0.89  | 4725                                               | 11.07             |
| 3 h                                           | N                       | 0.29  | 31668                                              | 75.92             |
|                                               | S1                      | 0.02  | 907                                                | 2.17              |
|                                               | S2                      | 0.70  | 3765                                               | 9.03              |
|                                               | S3                      | 0.89  | 5373                                               | 12.88             |

|     |    |      |       |       |
|-----|----|------|-------|-------|
| 4 h | N  | 0.29 | 30892 | 75.39 |
|     | S1 | 0.02 | 1278  | 3.12  |
|     | S2 | 0.71 | 3533  | 8.62  |
|     | S3 | 0.90 | 5274  | 12.87 |
| 5 h | N  | 0.29 | 31257 | 76.36 |
|     | S1 | 0.02 | 1160  | 2.82  |
|     | S2 | 0.71 | 3855  | 9.42  |
|     | S3 | 0.90 | 4666  | 11.39 |

where:

<sup>a)</sup> N - naproxen

S1, S2, S3 - products of chemical transformation of naproxen; and S2 was identified as naproxen ethyl ester

<sup>b)</sup> Area of the chromatographic band at  $\lambda_{\max}$



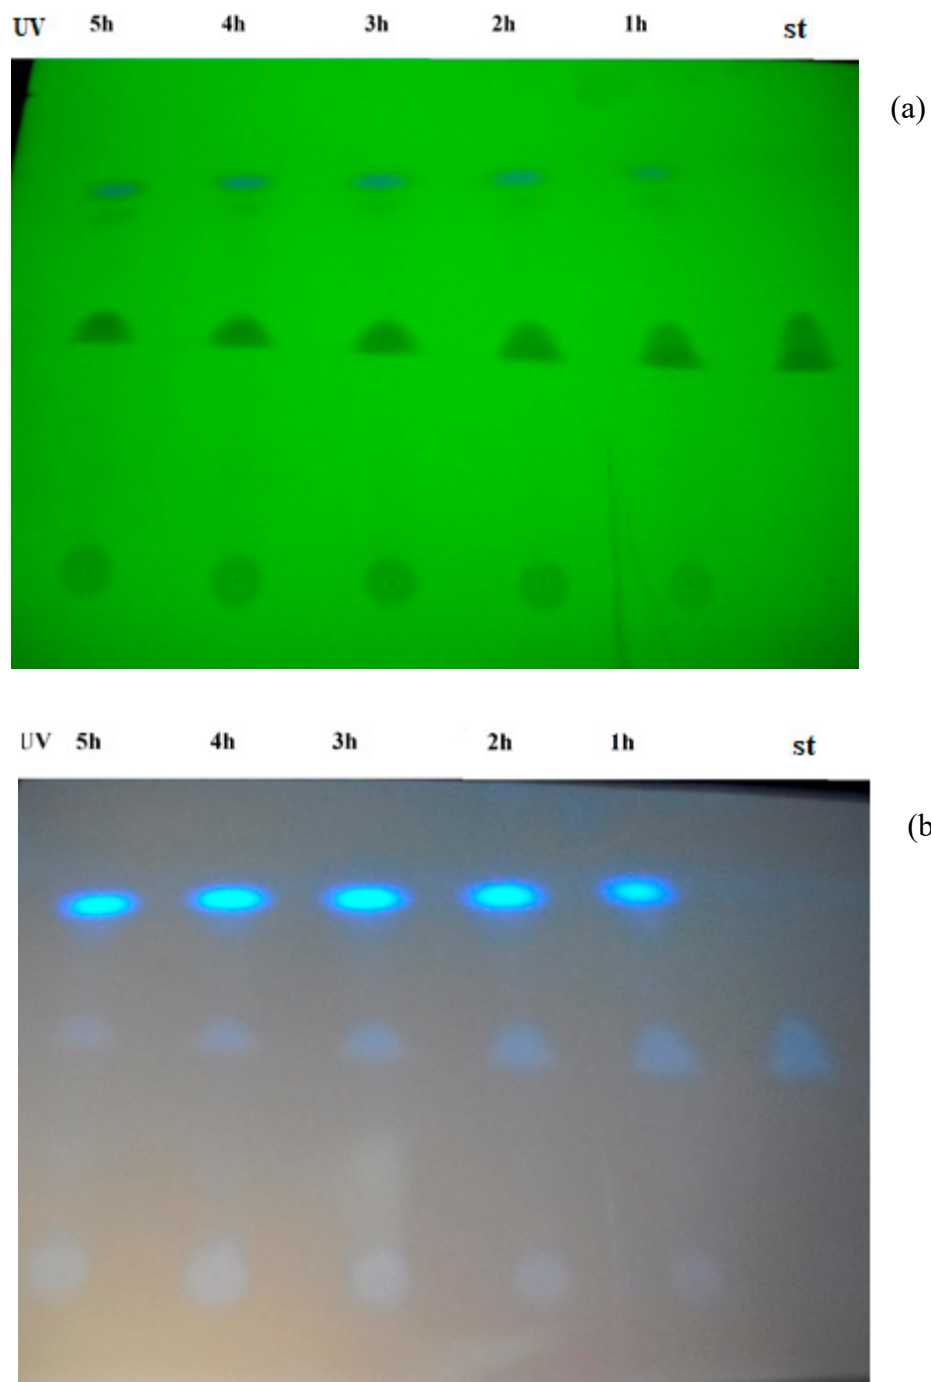

**Fig S13.** Photographs of chromatograms of naproxen that was irradiated with UV light ( 254 nm) on silica gel for 1 h, 2 h, 3 h, 4 h, 5 h before developing the chromatographic plate (mobile phase B: AcOH - Hex - ACE, 0.10:10:10, (v/v/v); photos taken under UV light at (a) 254 nm and (b) 366 nm); where st – standard of naproxen (non-irradiated)

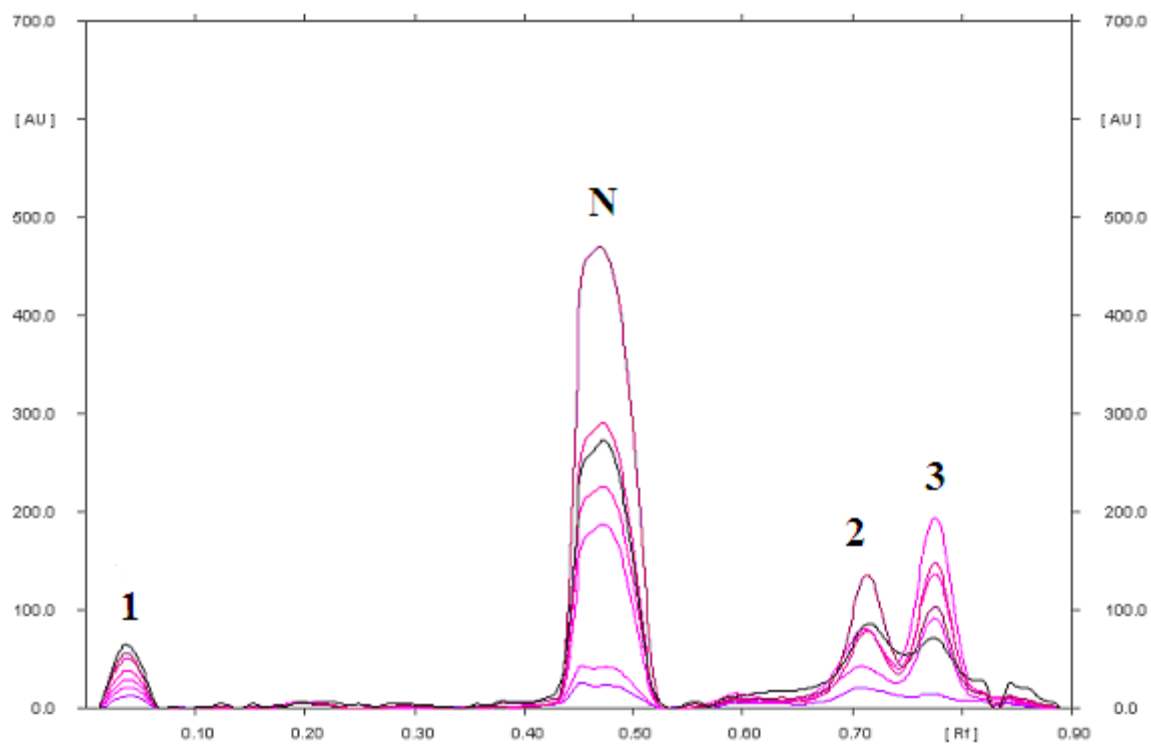

**Fig. S14.** Densitogram of naproxen irradiated on silica gel with UV light (254 nm) for a period of 5 h (mobile phase B: AcOH - Hex - ACE, 0.10:10:10 (v/v/v)).

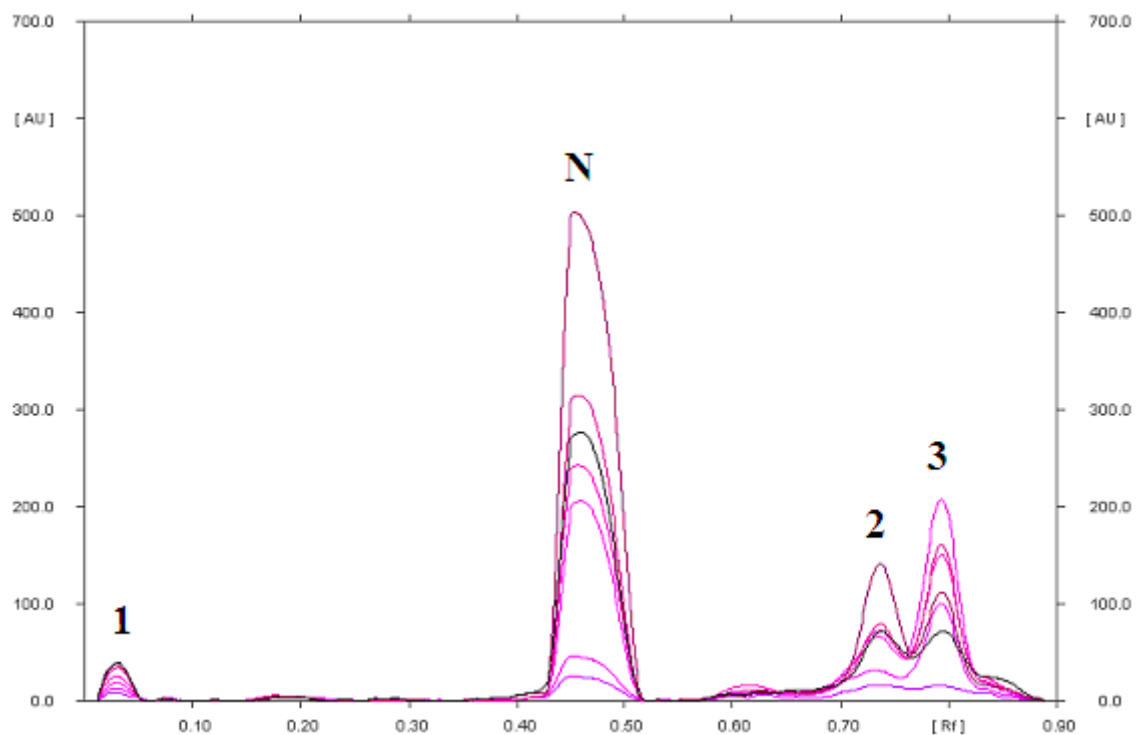

**Fig. S15.** Densitogram of naproxen irradiated on silica gel with UV light ( $\lambda = 254$  nm) for a period of 4 h (mobile phase B: AcOH - Hex - ACE, 0.10:10:10 (v/v/v)).

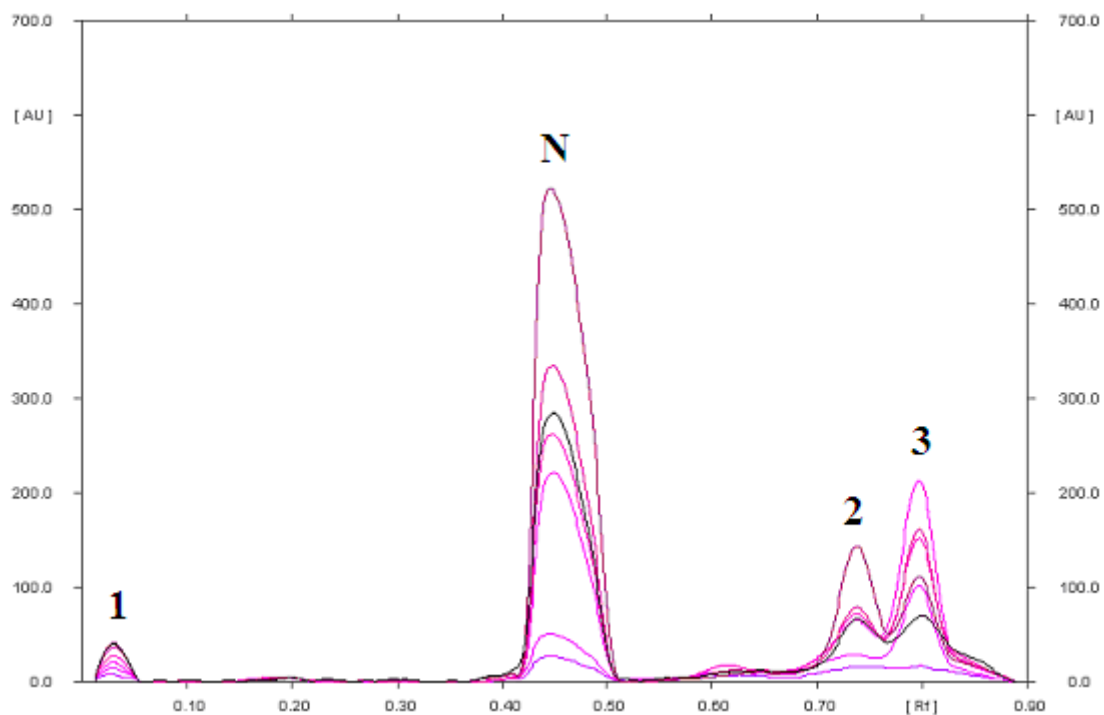

**Fig. S16.** Densitogram of naproxen irradiated on silica gel with UV light ( $\lambda = 254$  nm) for a period of 3 h (mobile phase B: AcOH - Hex - ACE, 0.10:10:10 (v/v/v)).

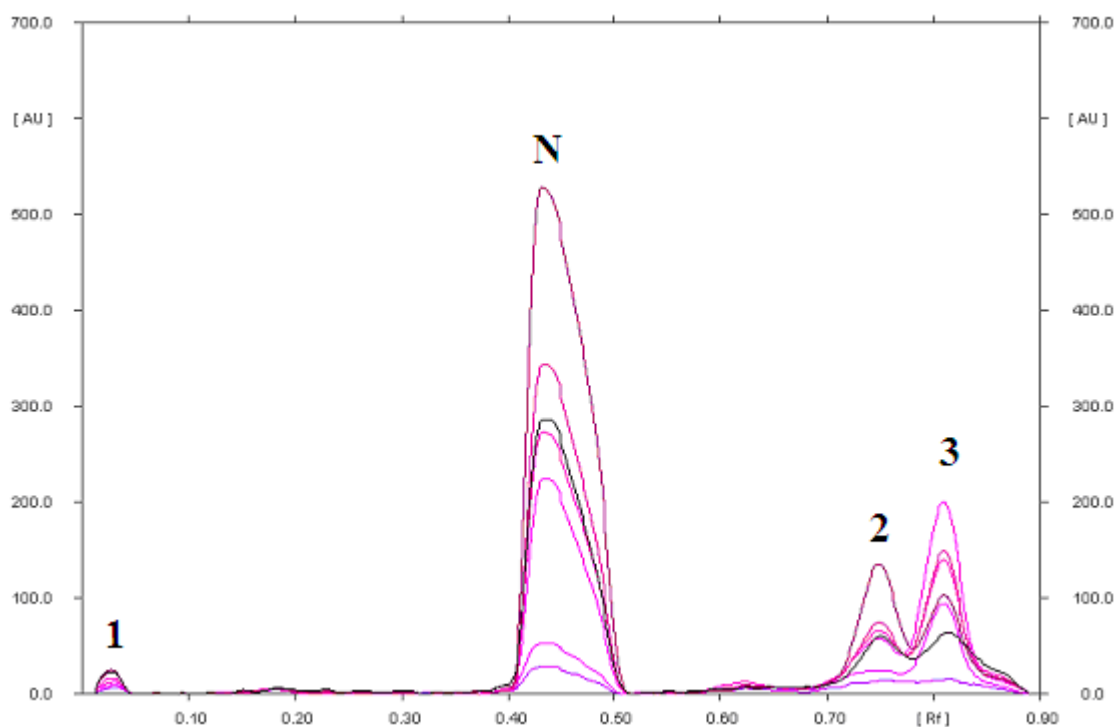

**Fig. S17.** Densitogram of naproxen irradiated on silica gel with UV light ( $\lambda = 254$  nm) for a period of 2 h (mobile phase B: AcOH - Hex - ACE, 0.10:10:10 (v/v/v)).

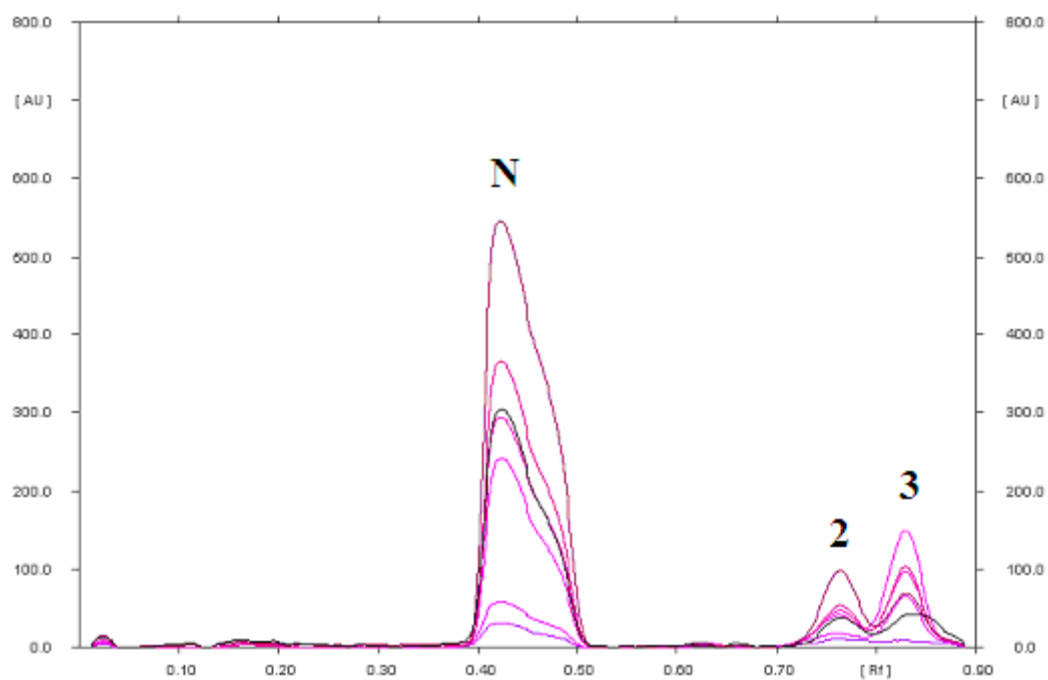

**Fig. S18.** Densitogram of naproxen irradiated on silica gel with UV light ( $\lambda = 254$  nm) for a period of 1 h (mobile phase B: AcOH - Hex - ACE, 0.10:10:10 (v/v/v)).

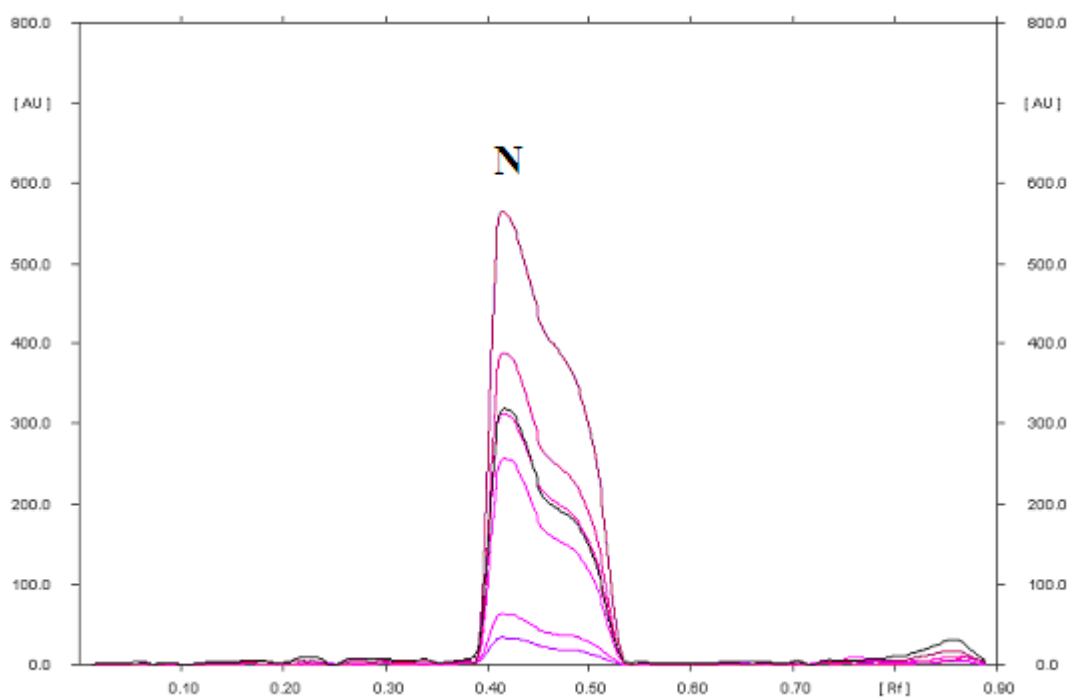

**Fig. S19.** Densitogram of naproxen standard (non-irradiated) (mobile phase B: AcOH - Hex - ACE, 0.10:10:10 (v/v/v)).

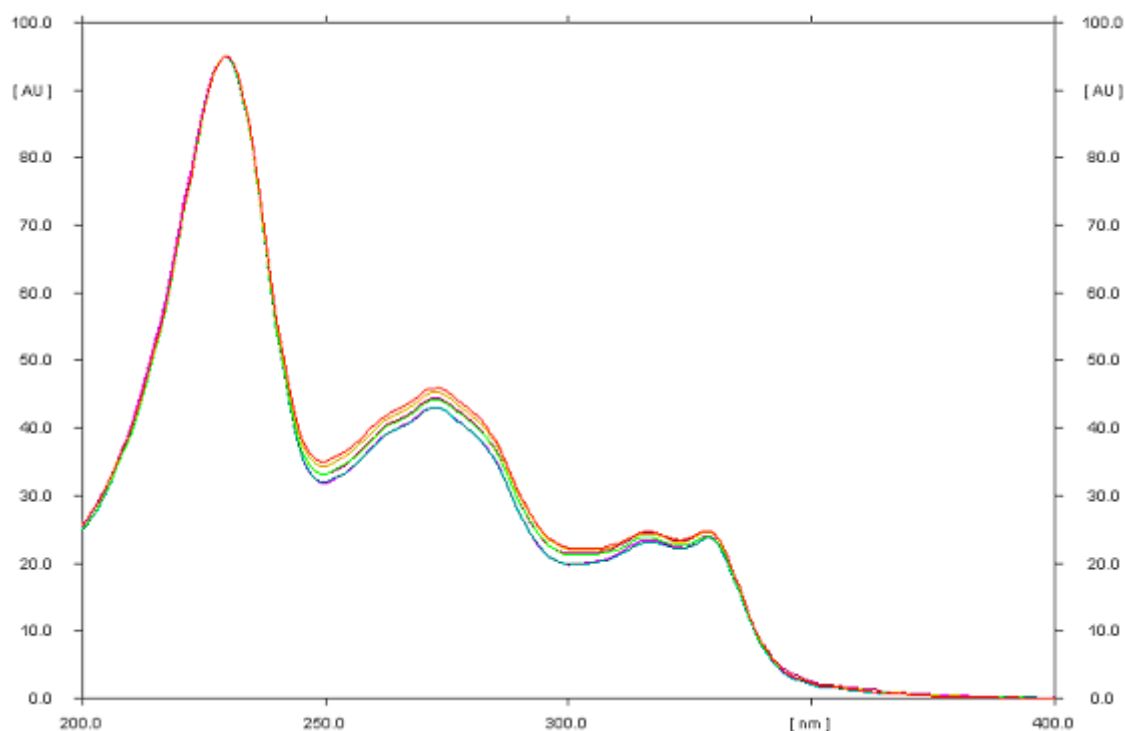

**Fig. S20.** The spectra of naproxen not exposed and irradiated with UV radiation at  $\lambda = 254$  nm for a period of 1 h to 5 h on silica gel (mobile phase B: AcOH - Hex - ACE, 0.10:10:10 (v/v/v)).

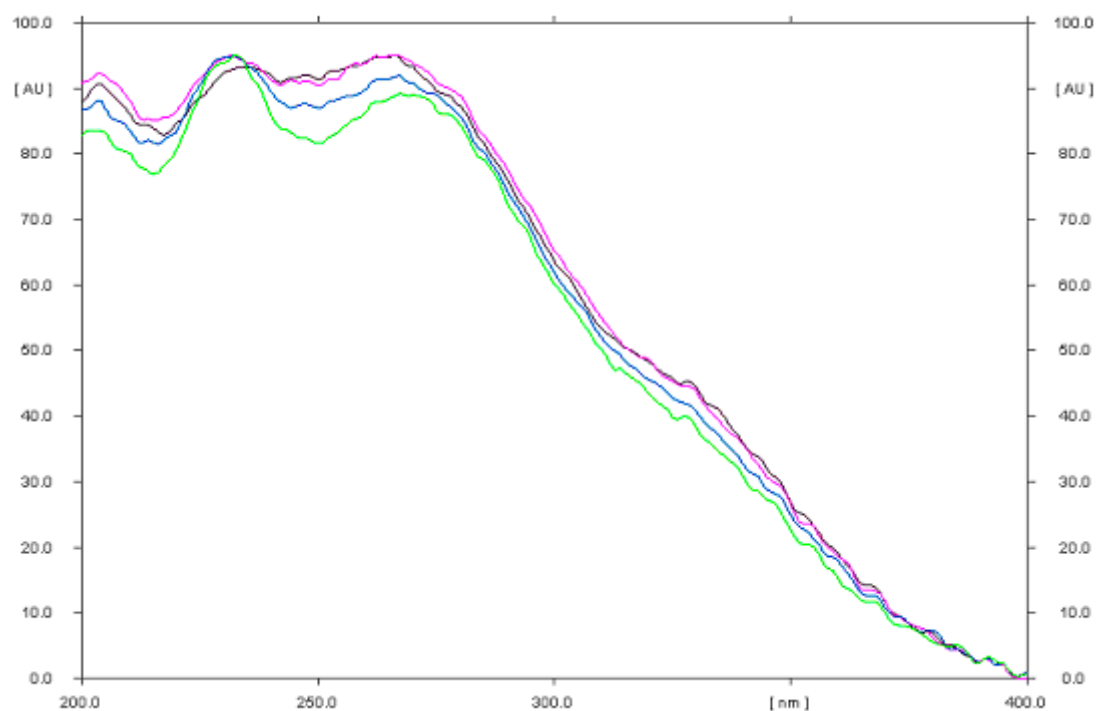

**Fig. S21.** The spectra of substance 1 with  $R_F = 0.03$  formed after UV irradiation with  $\lambda = 254$  nm naproxen on silica gel for 2 h, 3 h, 4 h and 5 h (mobile phase B: AcOH - Hex - ACE, 0.10:10:10 (v/v/v)).

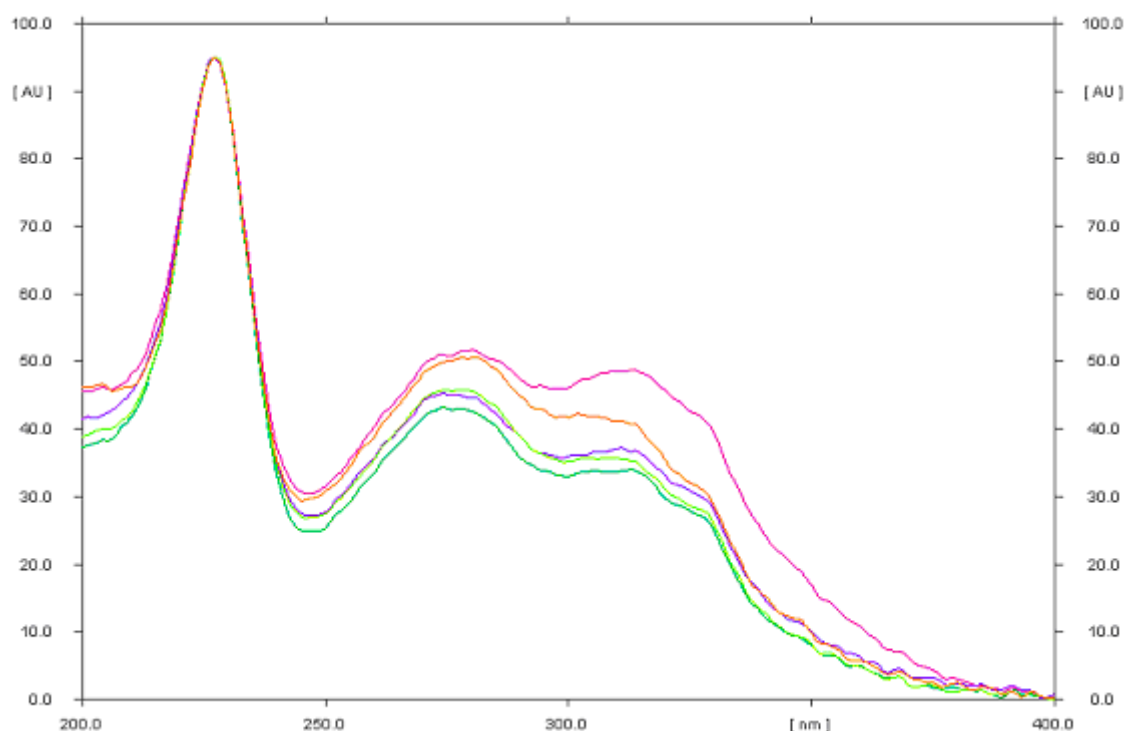

**Fig. S22.** Spectra of substance 2 with  $R_F = 0.74$  formed after UV irradiation with  $\lambda = 254$  nm naproxen on silica gel for 2 h, 3 h, 4 h and 5 h (mobile phase B: AcOH - Hex - ACE, 0.10:10:10 (v/v/v)).

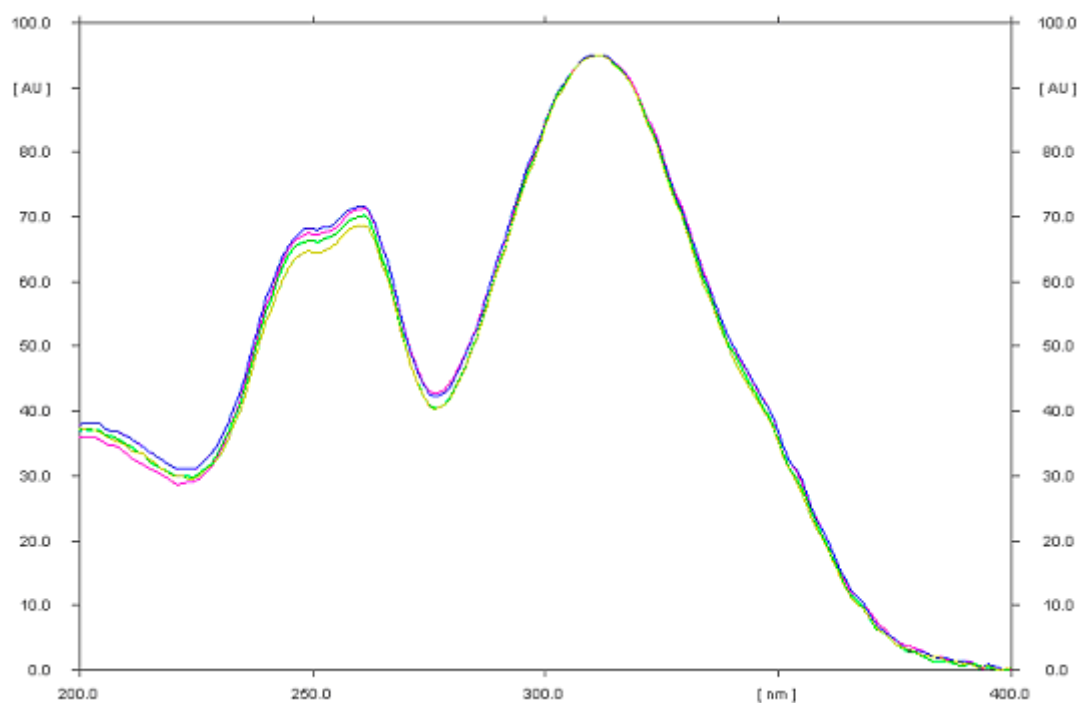

**Fig. S23.** Spectra of substance 3 with  $R_F = 0.79$  formed after UV irradiation with  $\lambda = 254$  nm naproxen on silica gel for 2 h, 3 h, 4 h and 5 h (mobile phase B: AcOH - Hex - ACE, 0.10:10:10 (v/v/v)).

**Table S2.**  $R_F$  values and of chromatographic peak areas of naproxen and its chemical transformation products under the influence of UV light with (254 nm) on silica gel, after separation using a mobile phase B: AcOH - Hex - ACE, 0.10:10:10 (v/v/v).

| Exposure time<br>of naproxen on<br>silica gel | Substance <sup>a)</sup> | $R_F$ | Chromatographic<br>peak area<br>[AU] <sup>b)</sup> | %<br>of band area |
|-----------------------------------------------|-------------------------|-------|----------------------------------------------------|-------------------|
| 0 h                                           | N                       | 0.44  | 37896                                              | 100               |
| 1 h                                           | N                       | 0.45  | 28703                                              | 90.52             |
|                                               | S1                      | —     | —                                                  | —                 |
|                                               | S2                      | 0.75  | 2337                                               | 7.37              |
|                                               | S3                      | 0.78  | 670                                                | 2.11              |
| 2 h                                           | N                       | 0.45  | 25327                                              | 83.60             |
|                                               | S1                      | 0.03  | 354                                                | 1.17              |
|                                               | S2                      | 0.74  | 2774                                               | 9.16              |
|                                               | S3                      | 0.81  | 1839                                               | 6.07              |
| 3 h                                           | N                       | 0.46  | 22429                                              | 71.78             |
|                                               | S1                      | 0.03  | 748                                                | 2.40              |
|                                               | S2                      | 0.74  | 3660                                               | 11.71             |
|                                               | S3                      | 0.80  | 4409                                               | 14.11             |
| 4 h                                           | N                       | 0.46  | 20843                                              | 69.65             |
|                                               | S1                      | 0.03  | 615                                                | 2.05              |
|                                               | S2                      | 0.74  | 3662                                               | 12.24             |
|                                               | S3                      | 0.79  | 4806                                               | 16.06             |
| 5 h                                           | N                       | 0.47  | 20640                                              | 65.53             |
|                                               | S1                      | 0.04  | 1223                                               | 3.88              |
|                                               | S2                      | 0.71  | 4216                                               | 13.39             |
|                                               | S3                      | 0.78  | 5416                                               | 17.20             |

<sup>a)</sup> N - naproxen

S1, S2, S3 - products of chemical transformation of naproxen; and S2 was identified as naproxen ethyl ester

<sup>b)</sup> Area of the chromatographic band at  $\lambda_{\max}$

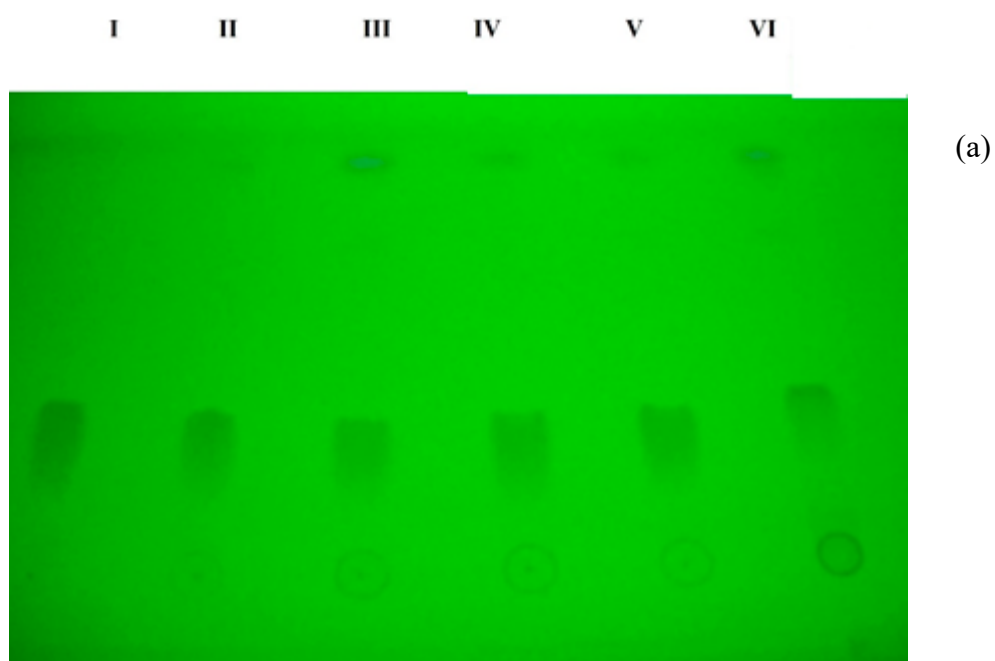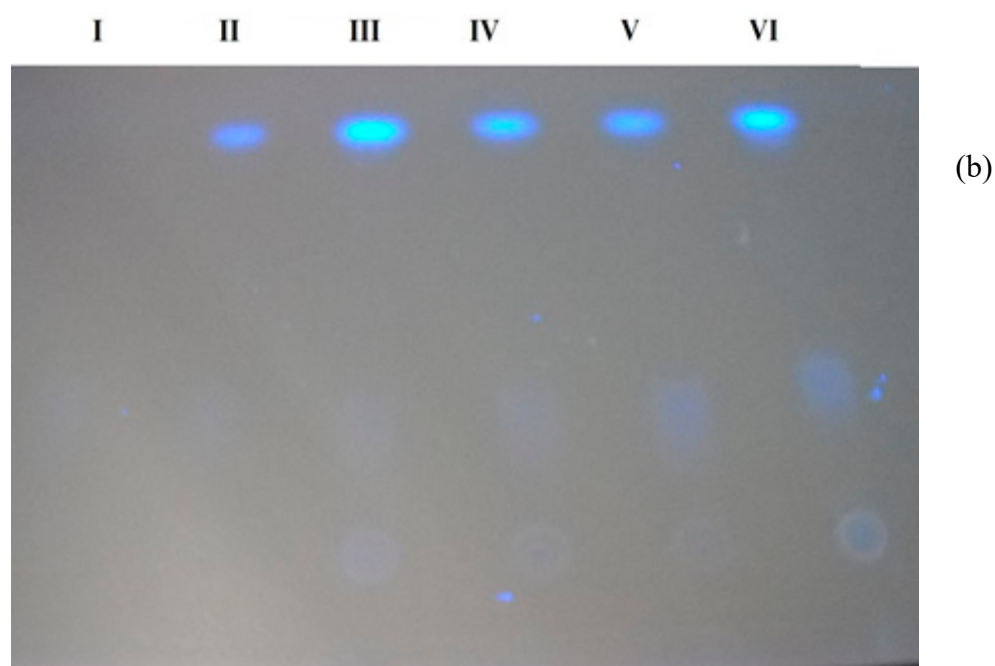

**Fig. S24.** Photographs of chromatograms, naproxen not exposed (I) and naproxen in solutions II, III, IV, V and VI irradiated for 5 h with UV radiation at  $\lambda = 254$  nm taken in UV light at 254 nm (a) and 366 nm (b), after separation using a mobile phase A : TOL - ACE - CHL, 2:5:12 (v/v/v).



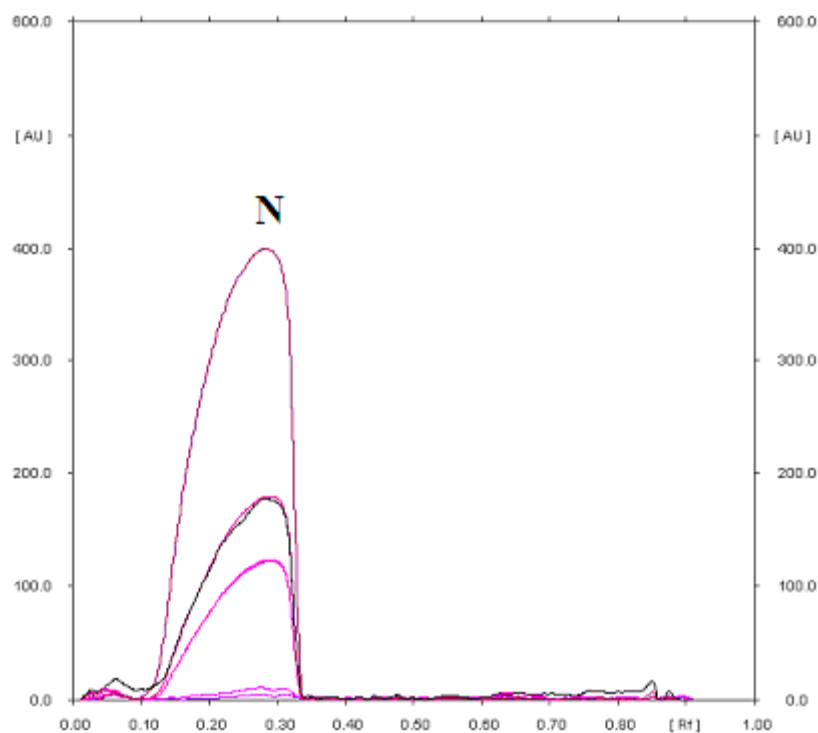

**Fig. S25.** Densitogram of naproxen standard (not exposed to UV) developed using mobile phase A: TOL - ACE - CHL (2:5:12, v/v/v).

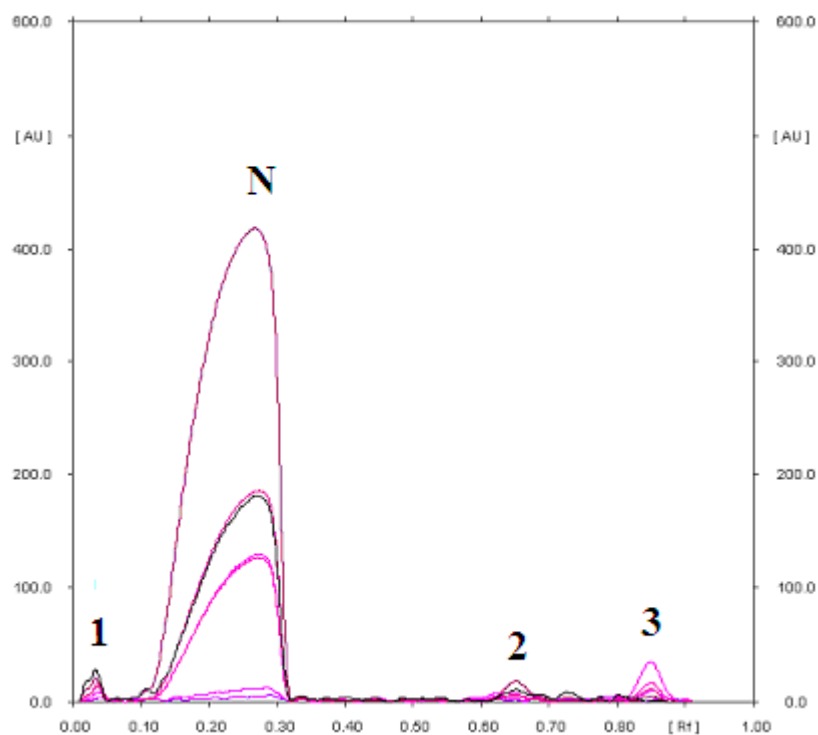

**Fig. S26.** Densitogram of naproxen (N) in solution of physiological salt (II), which was irradiated to UV light (254 nm) for 5h (mobile phase A: TOL-ACE-CHL; 2:5:12, v/v/v); 1, 2, 3 – degradation products of naproxen; and 2 was identified as naproxen ethyl ester.

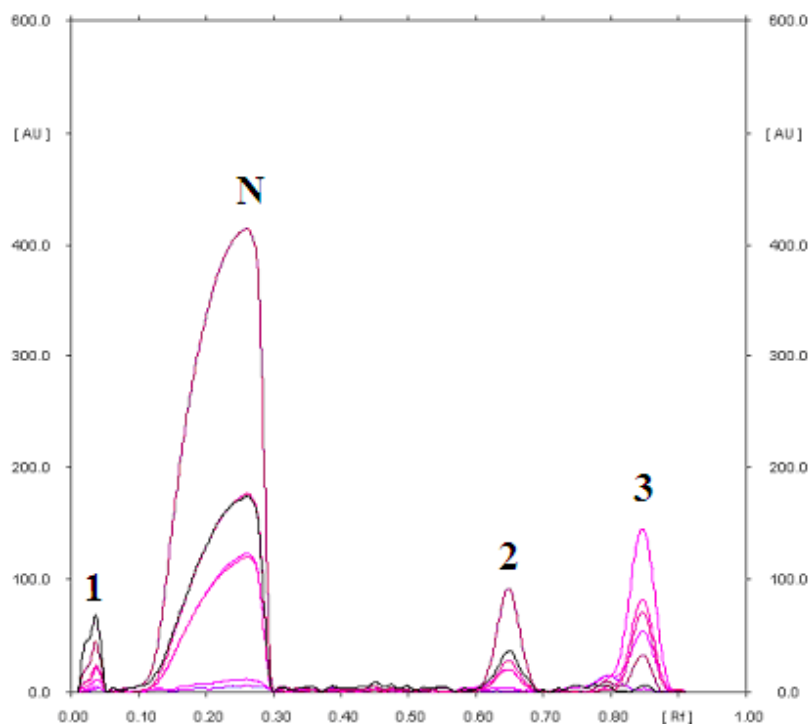

**Fig. S27.** Densitogram of naproxen (N) in solution of water at pH≈2.60 (III), which was irradiated to UV light (254 nm) for 5h (mobile phase A: TOL-ACE-CHL; 2:5:12, v/v/v); 1, 2, 3 – degradation products of naproxen; and 2 was identified as naproxen ethyl ester.

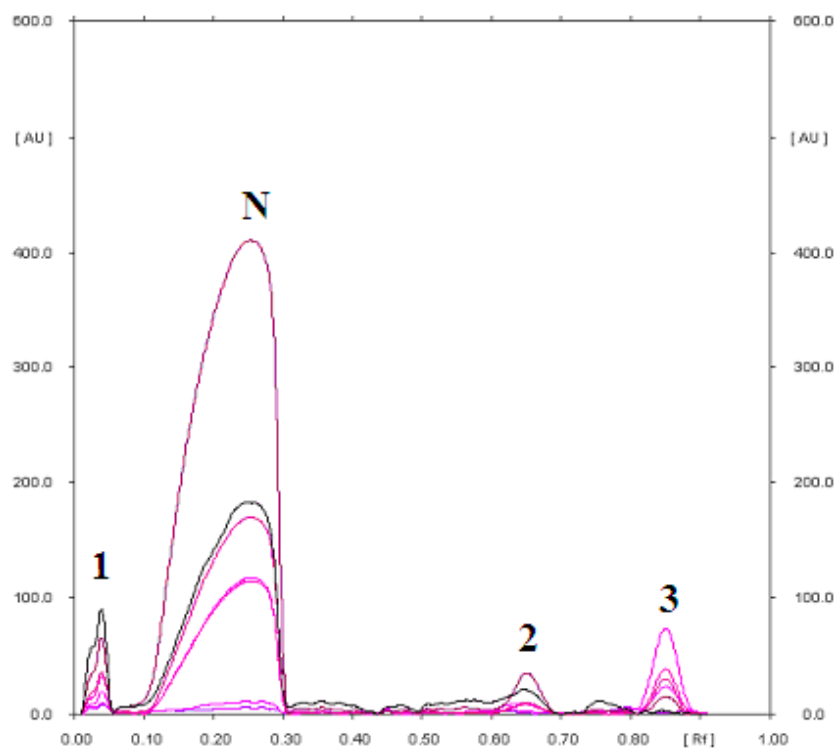

**Fig. S28.** Densitogram of naproxen (N) in solution of water at pH≈5.70 (IV), which was irradiated to UV light (254 nm) for 5h (mobile phase A: TOL-ACE-CHL; 2:5:12, v/v/v); 1, 2, 3 – degradation products of naproxen; and 2 was identified as naproxen ethyl ester.

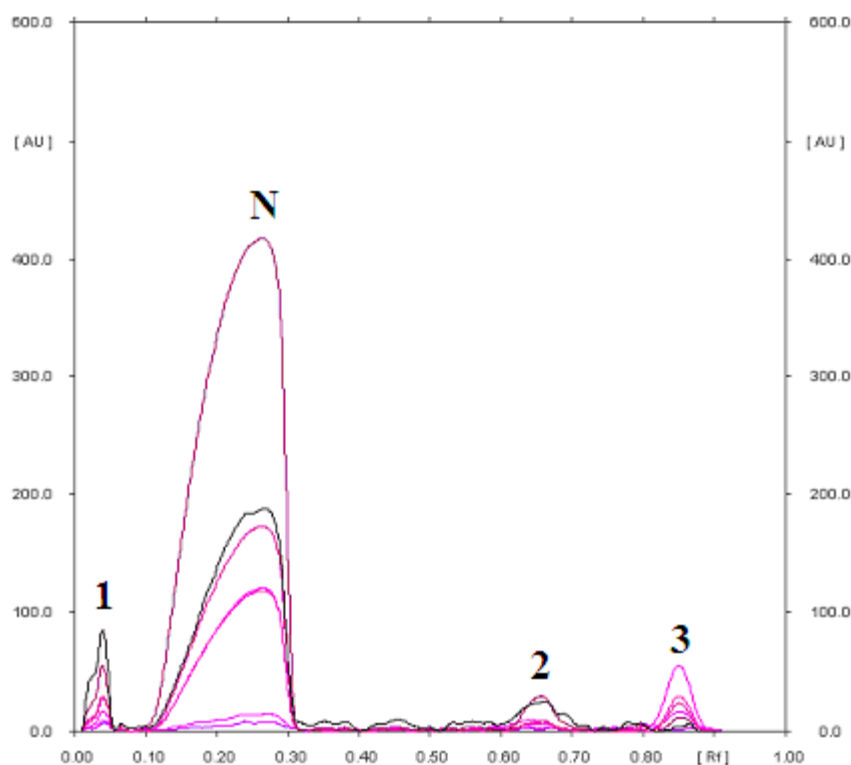

**Fig. S29.** Densitogram of naproxen (N) in solution of water at pH≈8.50 (V) which was irradiated to UV light (254 nm) for 5h (mobile phase A: TOL-ACE-CHL; 2:5:12, v/v/v); 1, 2, 3 – degradation products of naproxen; and 2 was identified as naproxen ethyl ester.

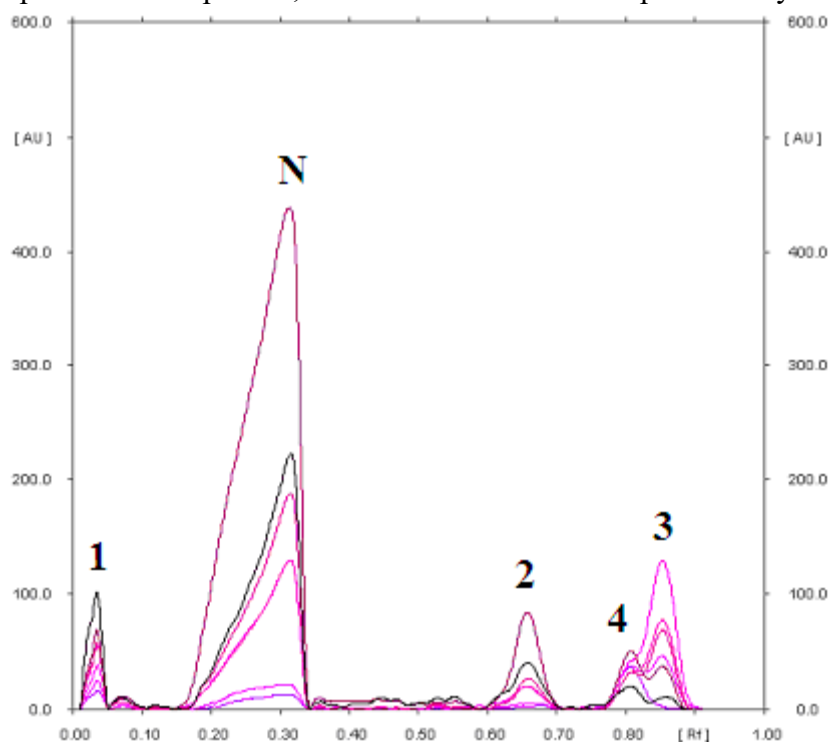

**Fig. S30.** Densitogram of naproxen (N) in hydrogen peroxide (VI), which was exposed to UV radiation ( $\lambda=254$  nm) irradiated to UV light (254 nm) for 5h (mobile phase A: TOL-ACE-CHL; 2:5:12, v/v/v); 1, 2, 3 – degradation products of naproxen; and 2 was identified as naproxen ethyl ester.

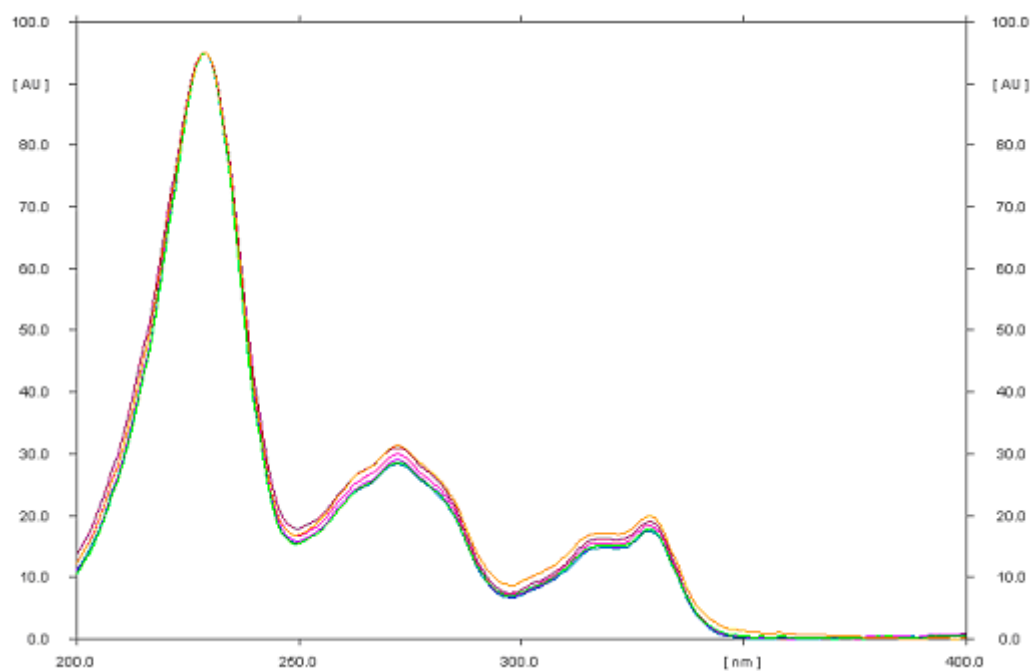

**Fig. S31.** Comparison of naproxen spectra ( $R_F = 0.29$ ), which in solutions II, III, IV, V, VI was irradiated from above for 5 h and naproxen standard (mobile phase A: TOL - ACE - CHL, 2:5:12 (v/v/v)).

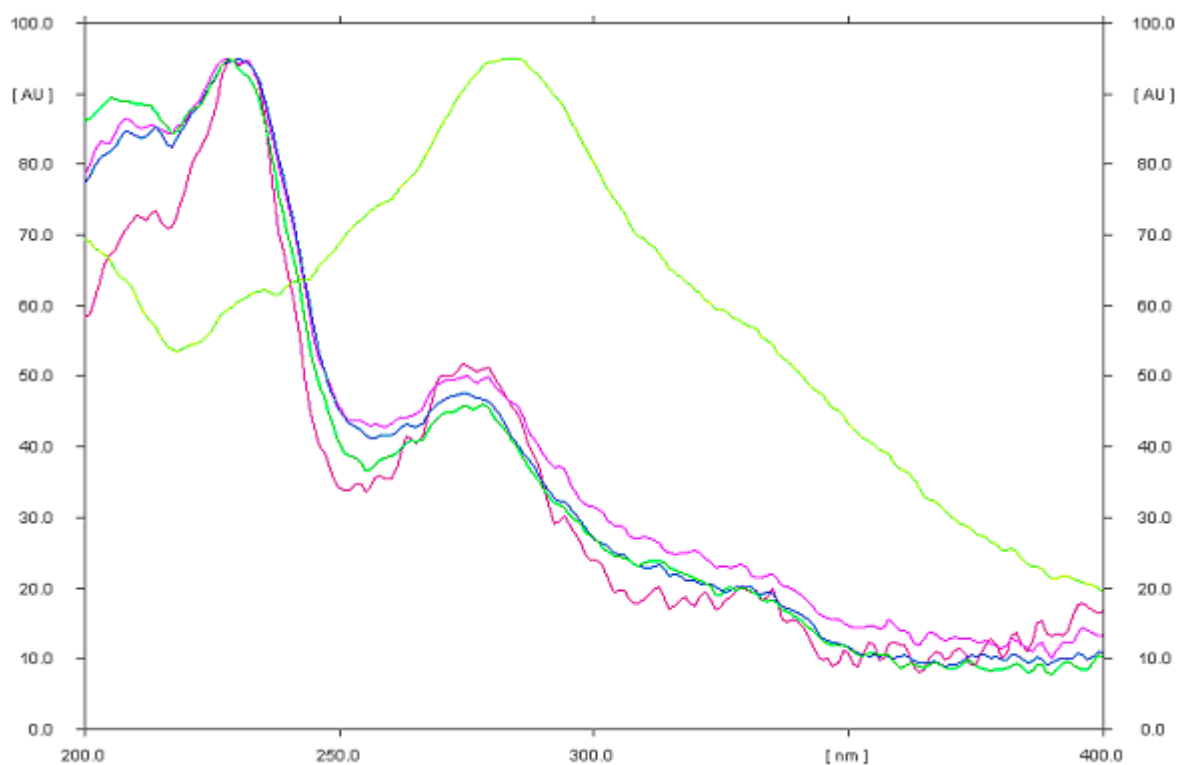

**Fig. S32.** Spectra of substance 1 with  $R_F = 0.03$  formed after irradiation of naproxen in solutions II, III, IV, V, VI for 5 h (mobile phase A: TOL - ACE - CHL, 2:5:12 (v/v/v)).

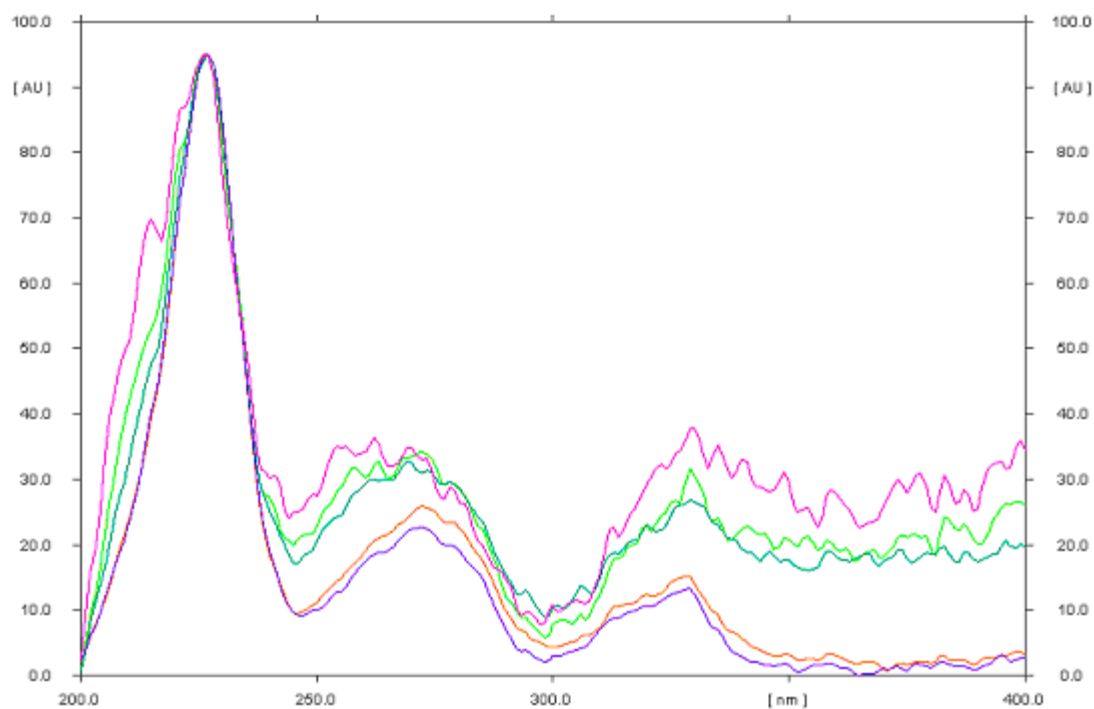

**Fig. S33.** Spectra of substance 2 (naproxen ethyl ester) with  $R_F = 0.65$  formed after irradiation of naproxen in solutions II, III, IV, V, VI for 5 h (mobile phase A: TOL - ACE - CHL, 2:5:12 (v/v/v)).

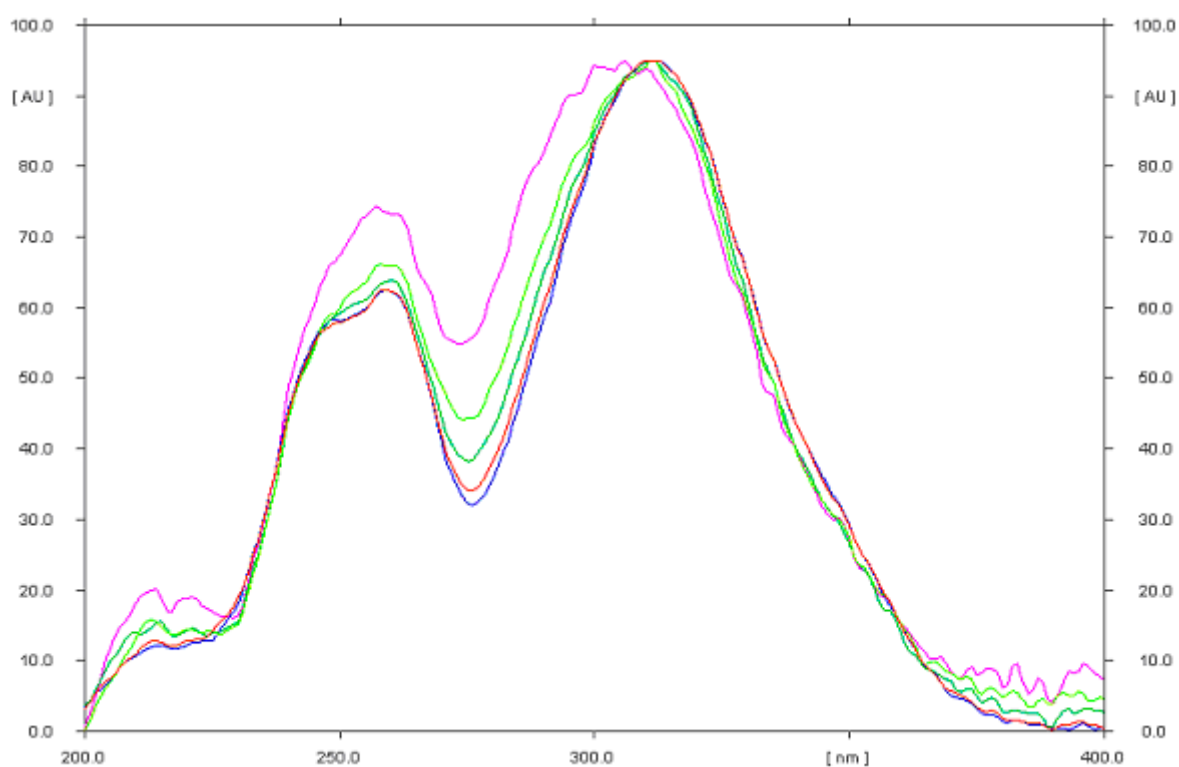

**Fig. S34.** Spectra of substance 3 with  $R_F = 0.85$  formed after irradiation of naproxen in solutions II, III, IV, V, VI for 5 h (mobile phase A: TOL - ACE - CHL, 2:5:12 (v/v/v)).

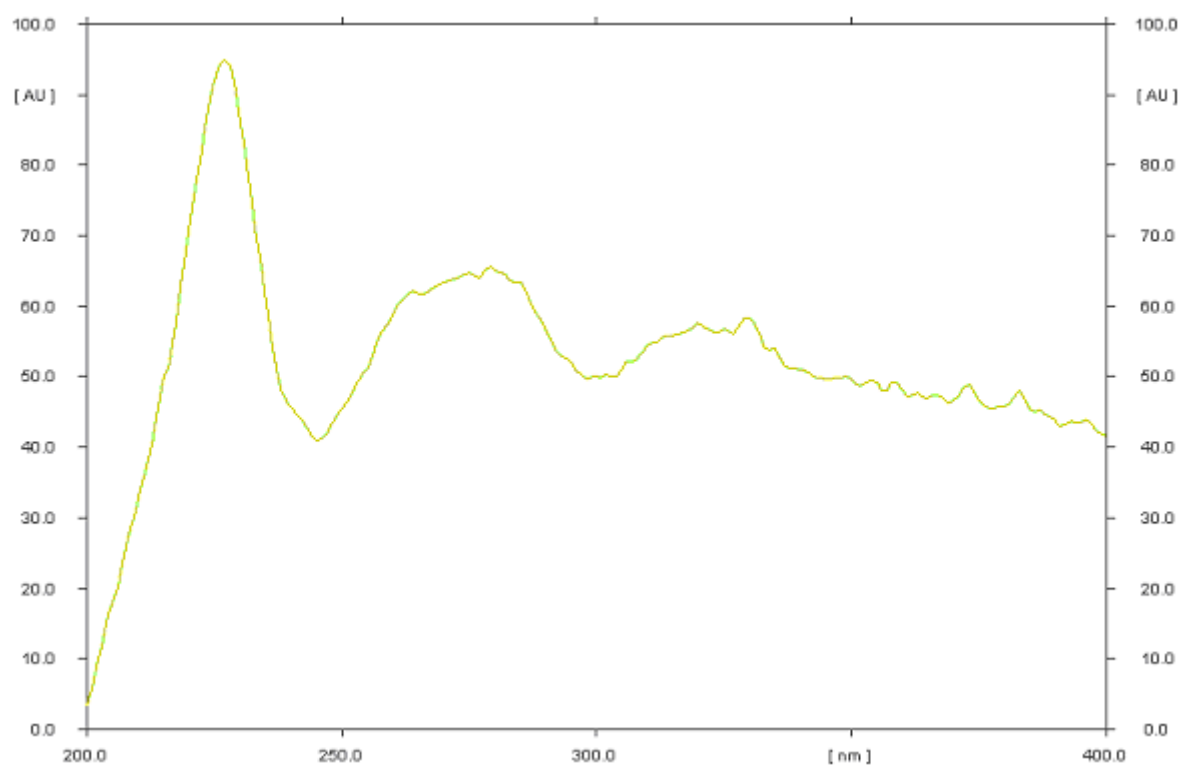

**Fig. S35.** Spectra of substance 4 with  $R_F = 0.81$  formed after irradiation of naproxen in solutions II, III, IV, V, VI for 5 h (mobile phase A: TOL - ACE - CHL, 2:5:12 (v/v/v)).

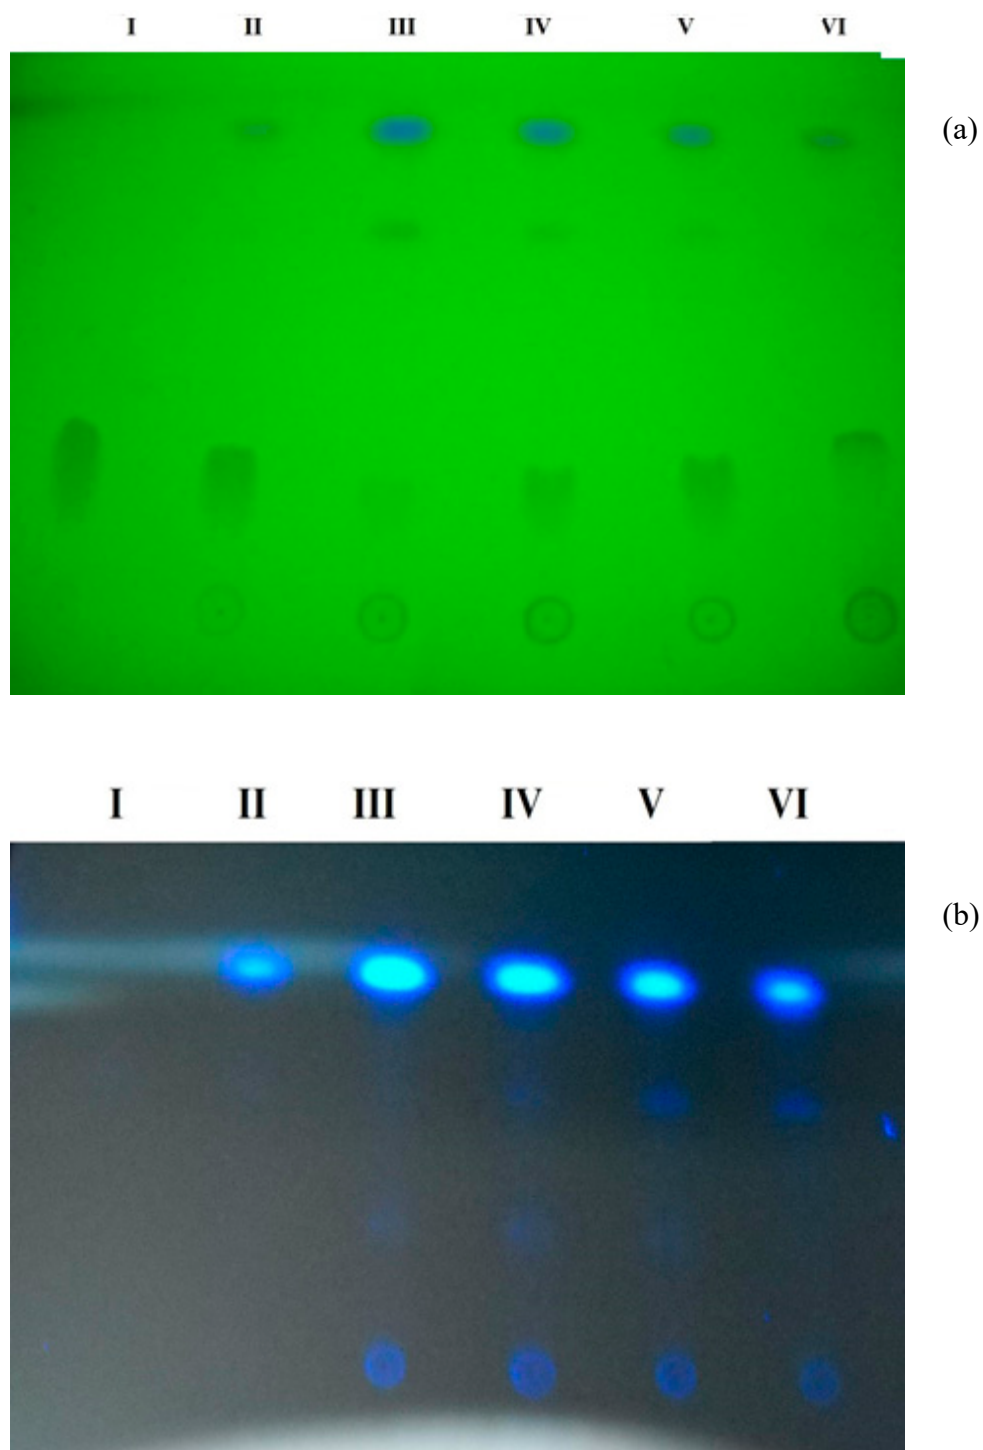

**Fig. S36.** Photographs of chromatograms, naproxen not exposed (I) and naproxen in solutions II, III, IV, V and VI irradiated for 10 h with UV radiation ( $\lambda = 254$  nm) taken at 254 nm (a) and 366 nm (b), after separation using a mobile phase A: TOL - ACE - CHL, 2:5:12 (v/v/v).

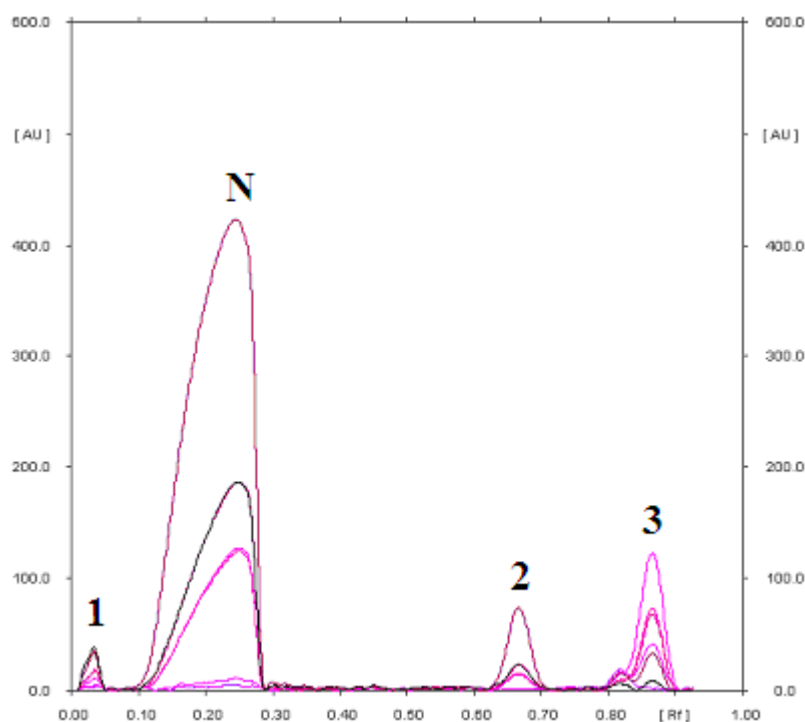

**Fig. S37.** Densitogram of naproxen (N) in solution of physiological salt (II), which was irradiated to UV light (254 nm) for 10 h (mobile phase A: TOL - ACE - CHL; 2:5:12, v/v/v); 1, 2, 3 – degradation products of naproxen; and 2 was identified as naproxen ethyl ester.

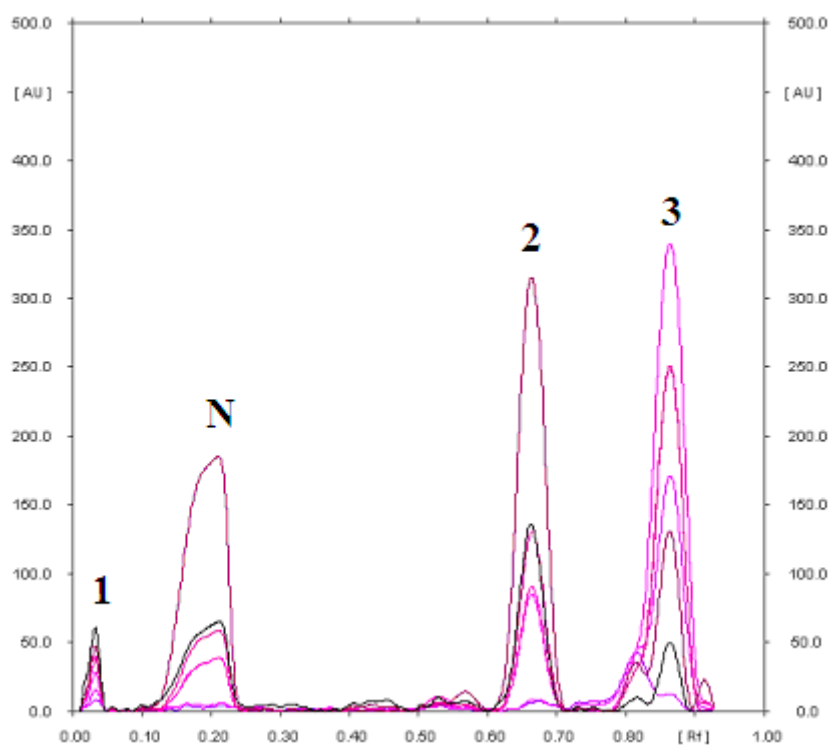

**Fig. S38.** Densitogram of naproxen (N) in water at pH≈2.60 (III), which was irradiated to UV light (254 nm) for 10 h (mobile phase A: TOL - ACE - CHL; 2:5:12, v/v/v); 1, 2, 3 – degradation products of naproxen; and 2 was identified as naproxen ethyl ester.



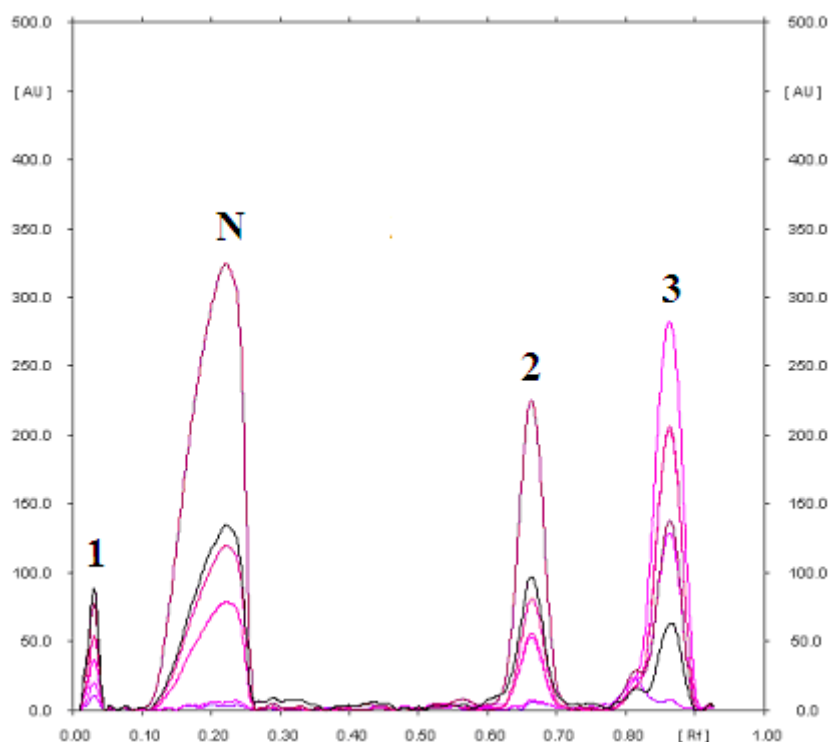

**Fig. S39.** Densitogram of naproxen (N) in water at pH $\approx$ 5.70 (IV), which was irradiated to UV light (254 nm) for 10 h (mobile phase A: TOL - ACE - CHL; 2:5:12, v/v/v); 1, 2, 3 – degradation products of naproxen; and 2 was identified as naproxen ethyl ester.

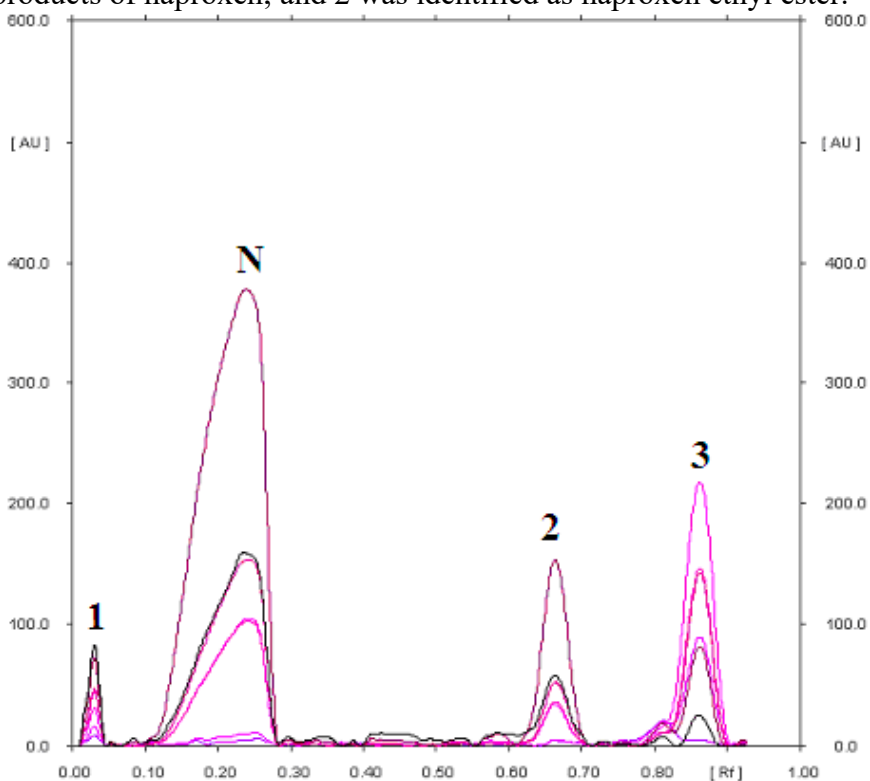

**Fig. S40.** Densitogram of naproxen (N) in water at pH $\approx$ 8.50 (V), which was irradiated to UV light (254 nm) for 10 h (mobile phase A: TOL - ACE - CHL; 2:5:12, v/v/v); 1, 2, 3 – degradation products of naproxen; and 2 was identified as naproxen ethyl ester.

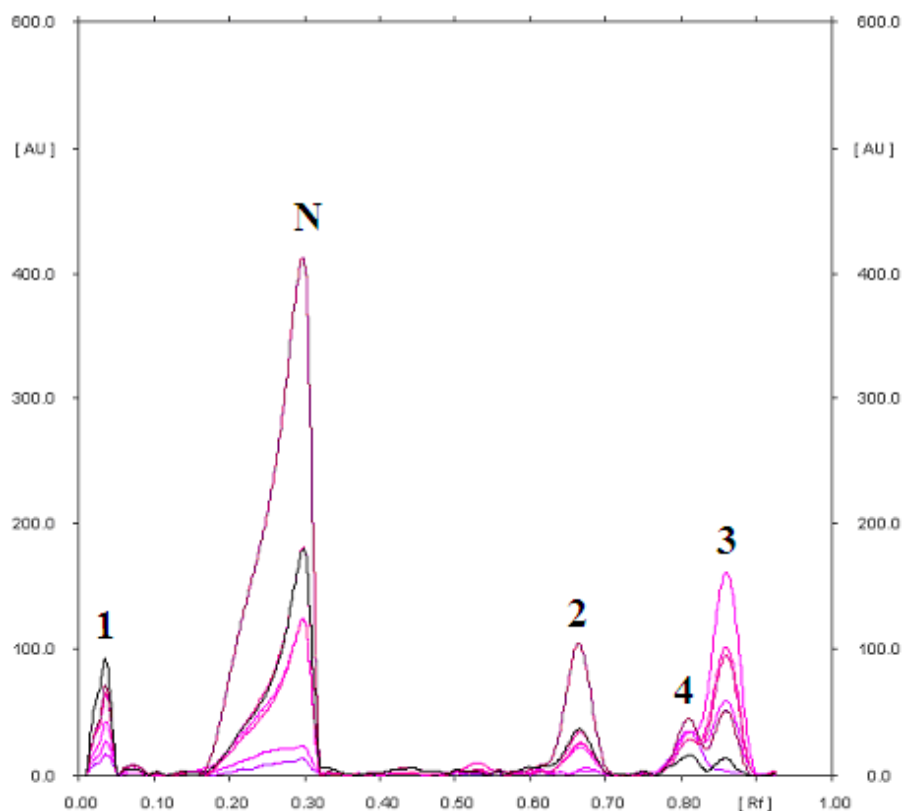

**Fig. S41.** Densitogram of naproxen (N) in hydrogen peroxide (VI), which was irradiated to UV light (254 nm) for 10 h (mobile phase A: TOL - ACE - CHL; 2:5:12, v/v/v); 1, 2, 3,4 – degradation products of naproxen; and 2 was identified as naproxen ethyl ester.

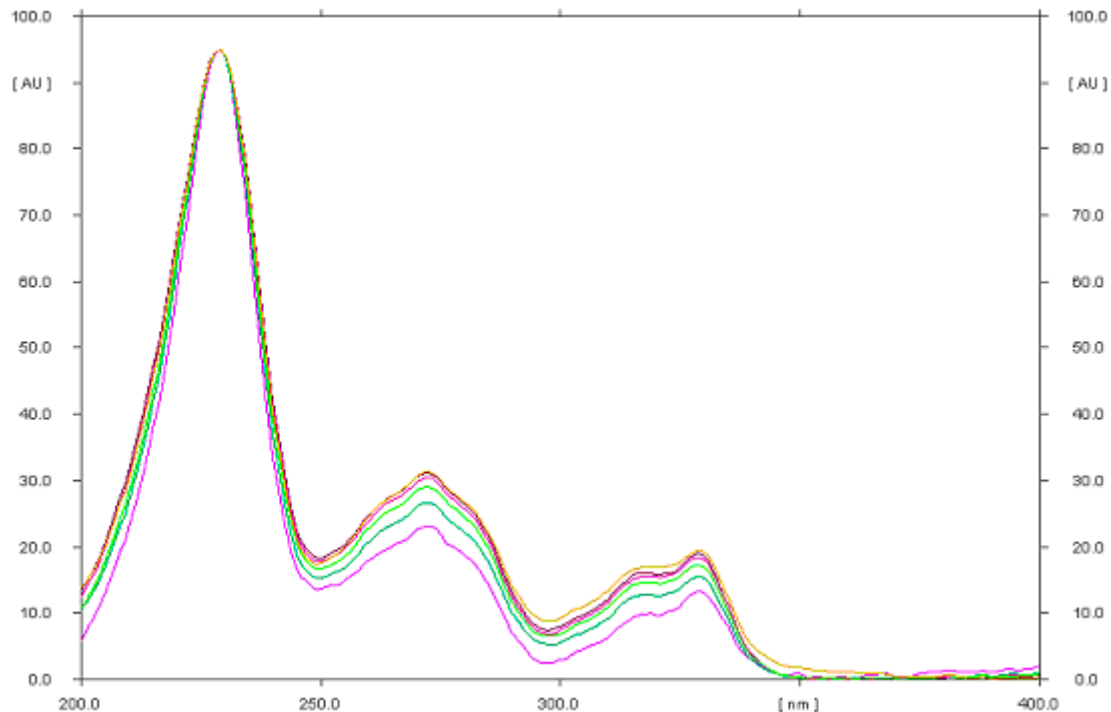

**Fig. S42.** Comparison of naproxen spectra ( $R_F = 0.26$ ), which in solutions II, III, IV, V, VI was irradiated from above for 10 h and naproxen standard (mobile phase A: TOL - ACE - CHL, 2:5:12, v/v/v).

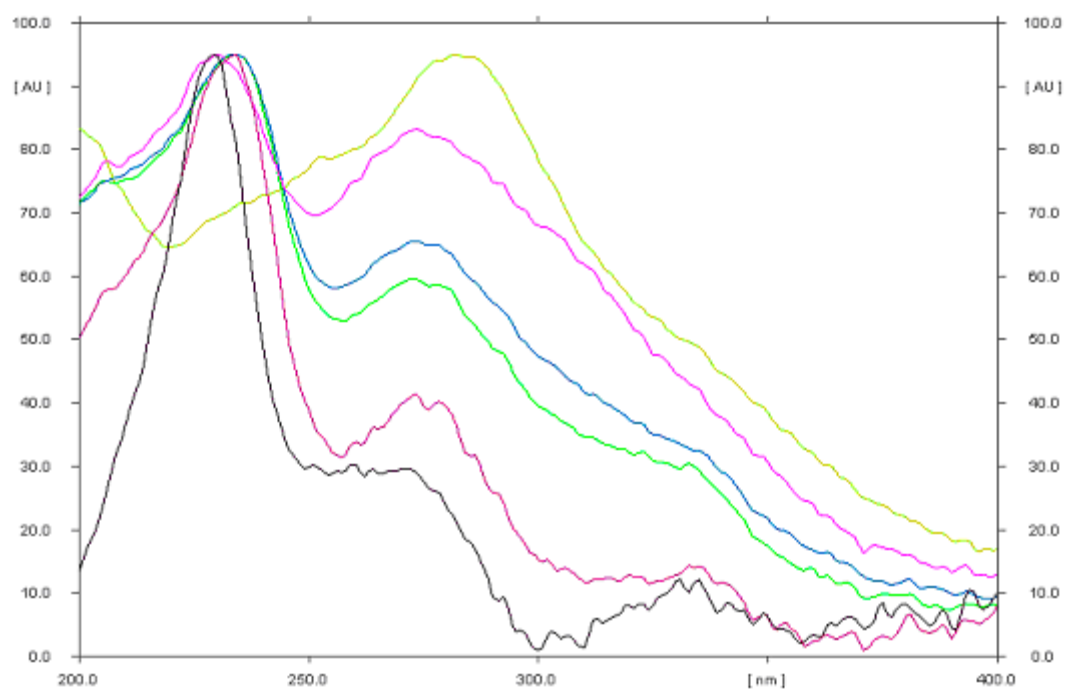

**Fig. S43.** Spectra of substance 1 with  $R_F = 0.03$  formed after irradiation of naproxen in solutions II, III, IV, V, VI for 10 h (mobile phase A: TOL - ACE - CHL, 2:5:12, v/v/v).

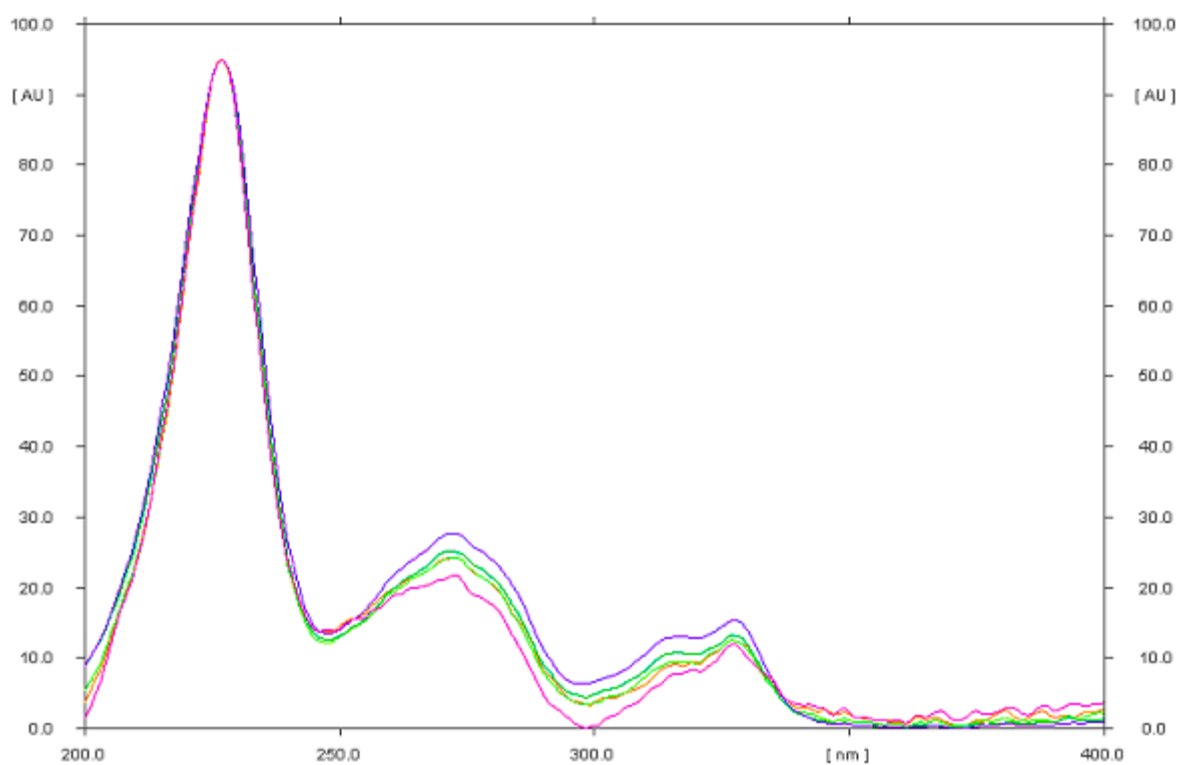

**Fig. S44.** Spectra of substance 2 (naproxen ethyl ester) with  $R_F = 0.67$  formed after irradiation of naproxen in solutions II, III, IV, V, VI for 10 h (mobile phase A: TOL - ACE - CHL, 2:5:12, v/v/v).

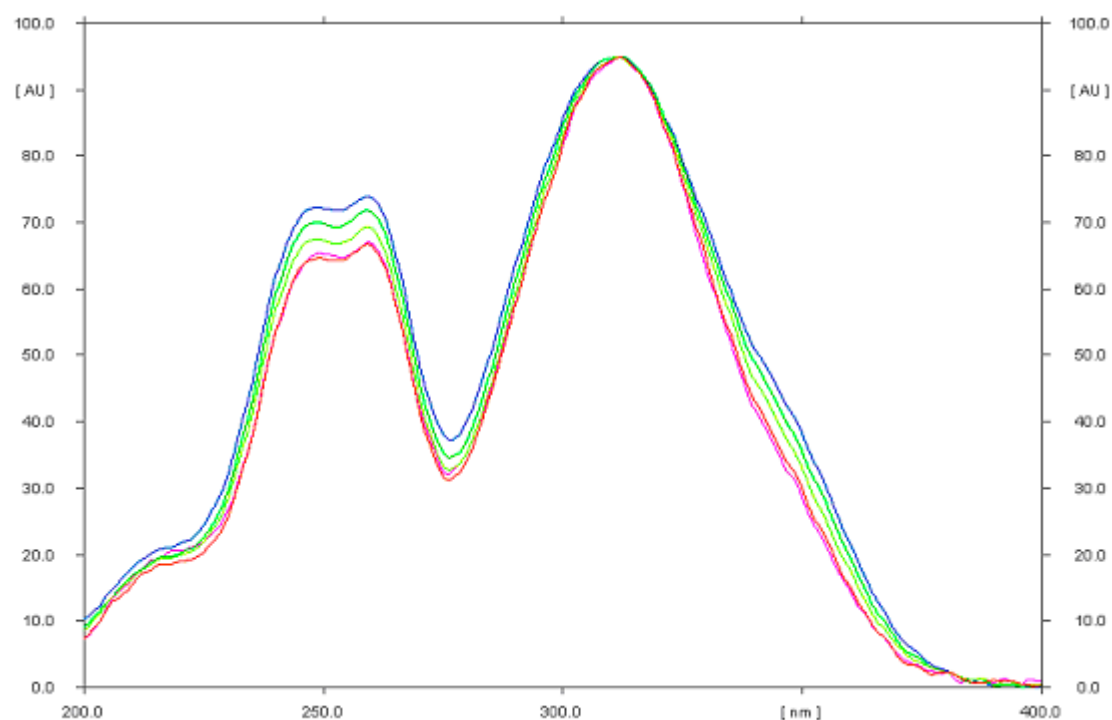

**Fig. S45.** Spectra of substance 3 with  $R_F = 0.86$  formed after irradiation of naproxen in solutions II, III, IV, V, VI for 10 h (mobile phase A: TOL - ACE - CHL, 2:5:12, v/v/v).

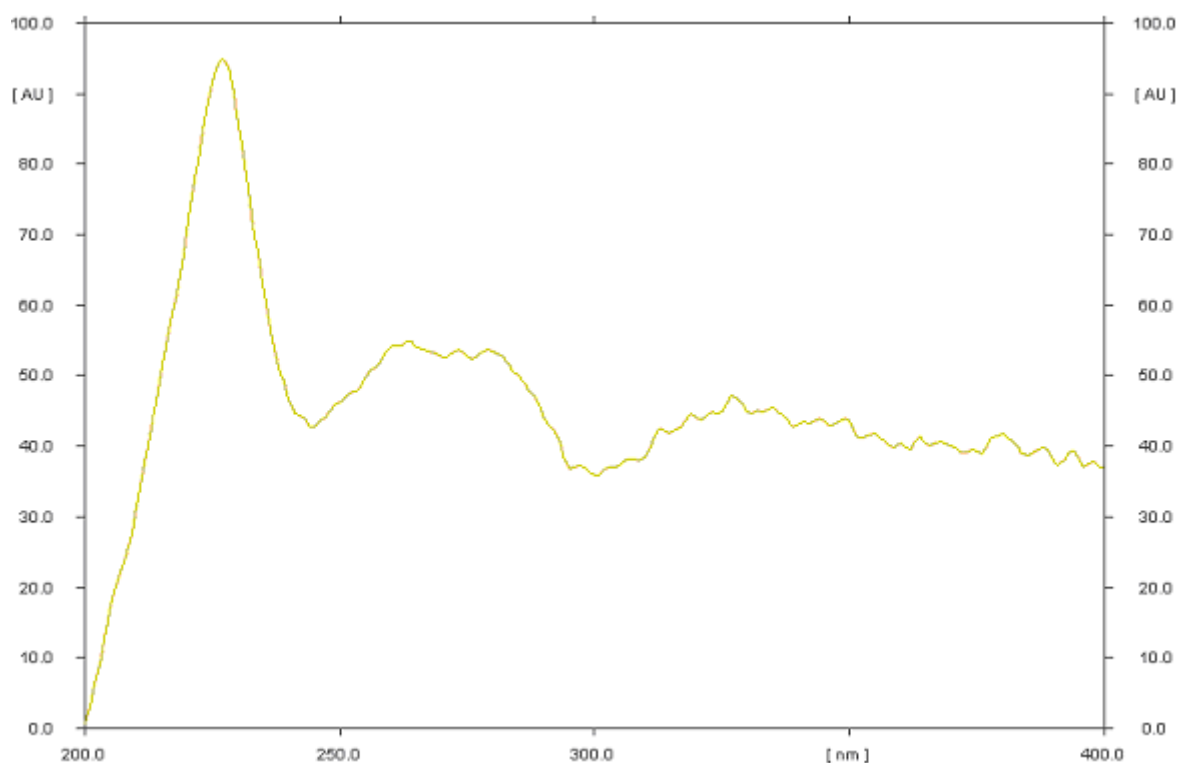

**Fig. S46.** Spectra of substance 4 with  $R_F = 0.81$  formed after irradiation of naproxen in solution VI for 10 h (mobile phase A: TOL - ACE - CHL, 2:5:12, v/v/v).

**Table S3.**  $R_F$  values and chromatographic peak areas of naproxen and its chemical transformation products formed in individual solutions irradiated from the top by UV light (254 nm), after separation using a mobile phase A: TOL - ACE - CHL 2:5:12 (v/v/v).

| Solution | Exposure time | Substance <sup>a)</sup> | $R_F$ | Chromatographic peak area [AU] <sup>b)</sup> | % of band area |
|----------|---------------|-------------------------|-------|----------------------------------------------|----------------|
| I        | 0 h           | N                       | 0.28  | 42457                                        | 100            |
|          |               | N                       | 0.27  | 41896                                        | 95.72          |
|          |               | S1                      | 0.03  | 271                                          | 0.62           |
|          |               | S2                      | 0.65  | 598                                          | 1.37           |
| II       | 5 h           | S3                      | 0.85  | 1005                                         | 2.29           |
|          |               | N                       | 0.25  | 34277                                        | 83.05          |
|          |               | S1                      | 0.02  | 840                                          | 2.03           |
|          |               | S2                      | 0.67  | 2150                                         | 5.21           |
|          | 10 h          | S3                      | 0.87  | 4008                                         | 9.71           |
|          |               | N                       | 0.26  | 37306                                        | 81.13          |
|          |               | S1                      | 0.04  | 596                                          | 1.30           |
|          |               | S2                      | 0.65  | 2889                                         | 6.28           |
| III      | 5 h           | S3                      | 0.85  | 5194                                         | 11.29          |
|          |               | N                       | 0.24  | 9513                                         | 27.64          |
|          |               | S1                      | 0.03  | 1376                                         | 4.00           |
|          |               | S2                      | 0.66  | 10538                                        | 30.61          |
|          | 10 h          | S3                      | 0.86  | 12993                                        | 37.75          |
|          |               | N                       | 0.25  | 41363                                        | 89.72          |
|          |               | S1                      | 0.04  | 1123                                         | 2.44           |
|          |               | S2                      | 0.65  | 1204                                         | 2.61           |
| IV       | 5 h           | S3                      | 0.85  | 2410                                         | 5.23           |
|          |               | N                       | 0.24  | 20603                                        | 51.39          |
|          |               | S1                      | 0.03  | 1827                                         | 4.56           |
|          |               | S2                      | 0.66  | 7174                                         | 17.90          |
|          | 10 h          | S3                      | 0.86  | 10485                                        | 26.15          |
|          |               | N                       | 0.26  | 40976                                        | 91.73          |
|          |               | S1                      | 0.04  | 782                                          | 1.75           |
|          |               | S2                      | 0.66  | 1079                                         | 2.41           |
| V        | 5 h           | S3                      | 0.85  | 1834                                         | 4.11           |
|          |               | N                       | 0.27  | 27115                                        | 66.26          |
|          |               | S1                      | 0.03  | 1561                                         | 3.81           |
|          |               | S2                      | 0.66  | 4637                                         | 11.33          |
|          | 10 h          | S3                      | 0.86  | 7609                                         | 18.60          |
|          |               | N                       | 0.31  | 30519                                        | 73.68          |
|          |               | S1                      | 0.03  | 887                                          | 2.14           |
|          |               | S2                      | 0.66  | 2832                                         | 6.84           |
| VI       | 5 h           | S3                      | 0.85  | 5682                                         | 13.72          |
|          |               | S4                      | 0.81  | 1502                                         | 3.62           |
|          |               | N                       | 0.29  | 20844                                        | 62.57          |
|          |               | S1                      | 0.03  | 1885                                         | 5.66           |
|          | 10 h          | S2                      | 0.67  | 3297                                         | 9.90           |
|          |               | S3                      | 0.86  | 6061                                         | 18.19          |
|          |               | S4                      | 0.81  | 1226                                         | 3.68           |

where:

<sup>a)</sup> N – naproxen

S1, S2, S3, S4 - products of chemical transformation of naproxen; and S2 was identified as naproxen ethyl ester

<sup>b)</sup> Area of the chromatographic band at  $\lambda_{\max}$

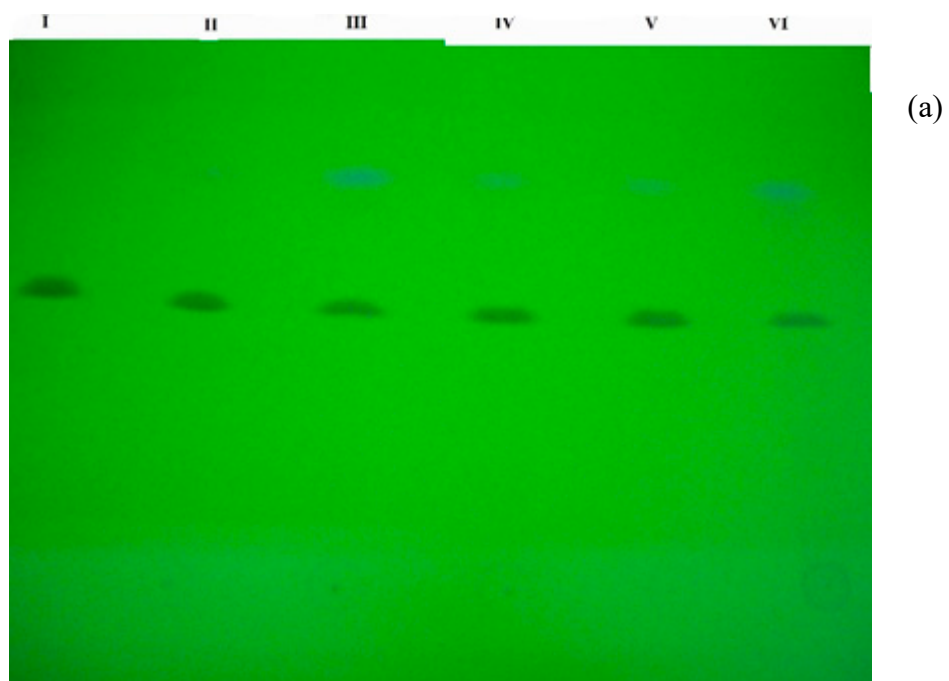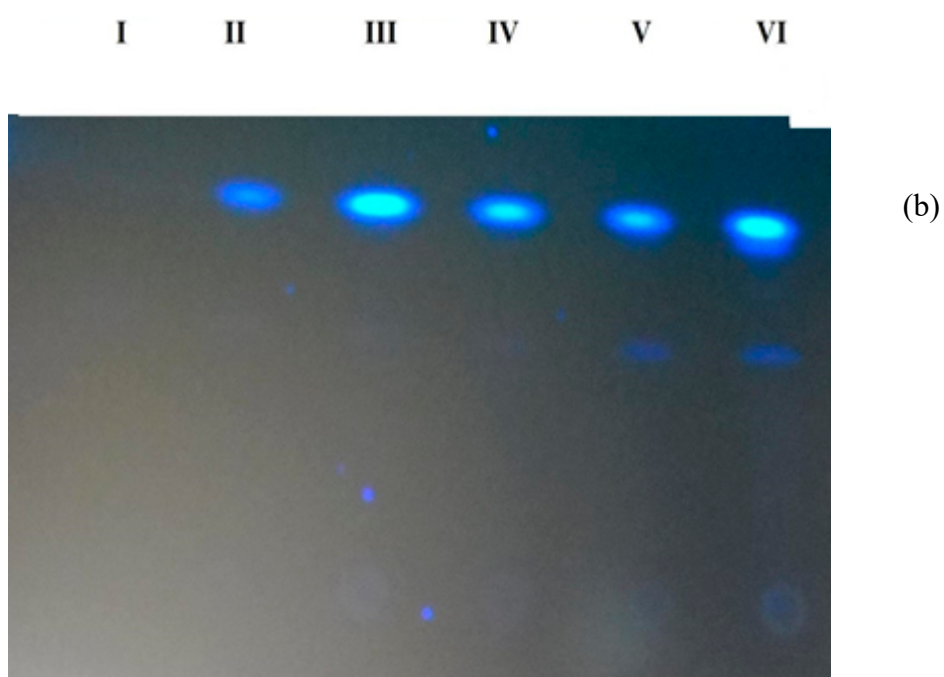

**Fig. S47.** Photographs of chromatograms, naproxen not exposed (I) and naproxen in solutions II, III, IV, V and VI irradiated for 5 h with UV radiation  $\lambda = 254\text{nm}$  taken at 254 nm (a) and 366 nm (b), after separation using a mobile phase B: AcOH - Hex - ACE, 0.10:10:10 (v/v/v).

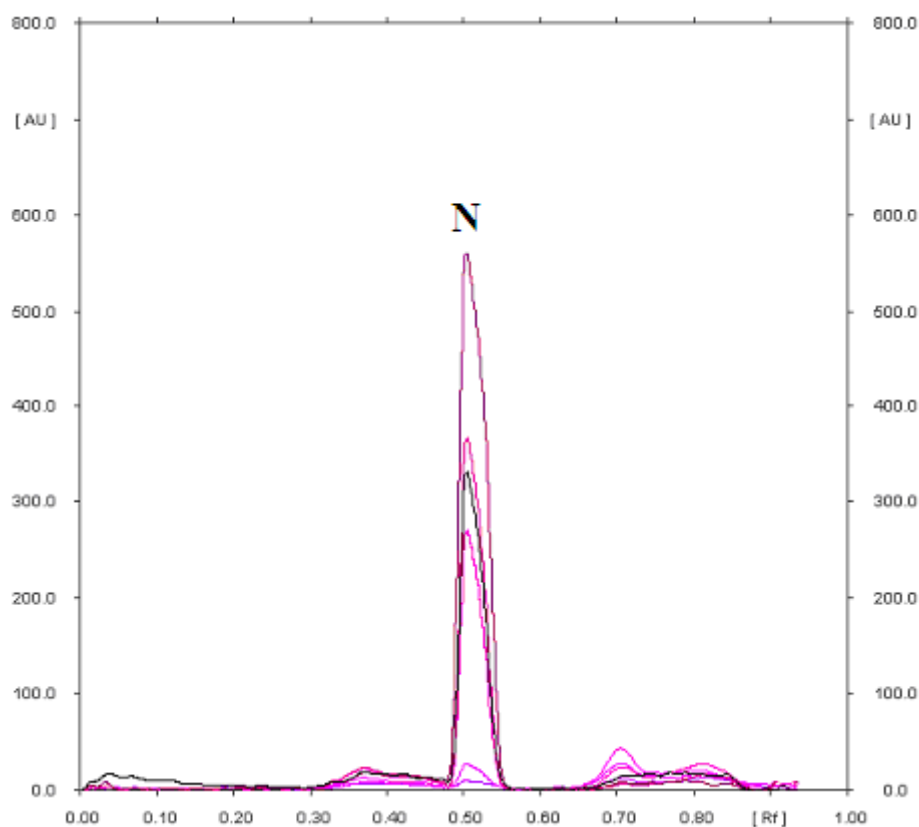

**Fig. S48.** Densitogram of naproxen standard (not exposed to UV) developed using mobile phase B: AcOH - Hex - ACE (0.10:10:10 ,v/v/v).

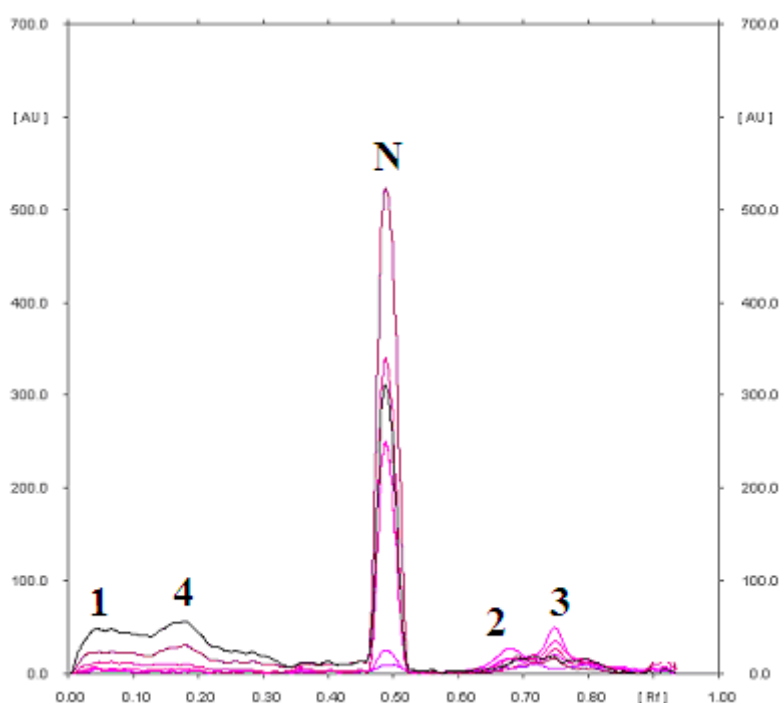

**Fig. S49.** Densitogram of naproxen (N) in solution of physiological salt (II), which was irradiated to UV light (254 nm) for 5h (mobile phase B: AcOH - Hex - ACE, 0.10:10:10, v/v/v); 1, 2, 3,4 – degradation products of naproxen; and 2 was identified as naproxen ethyl ester.

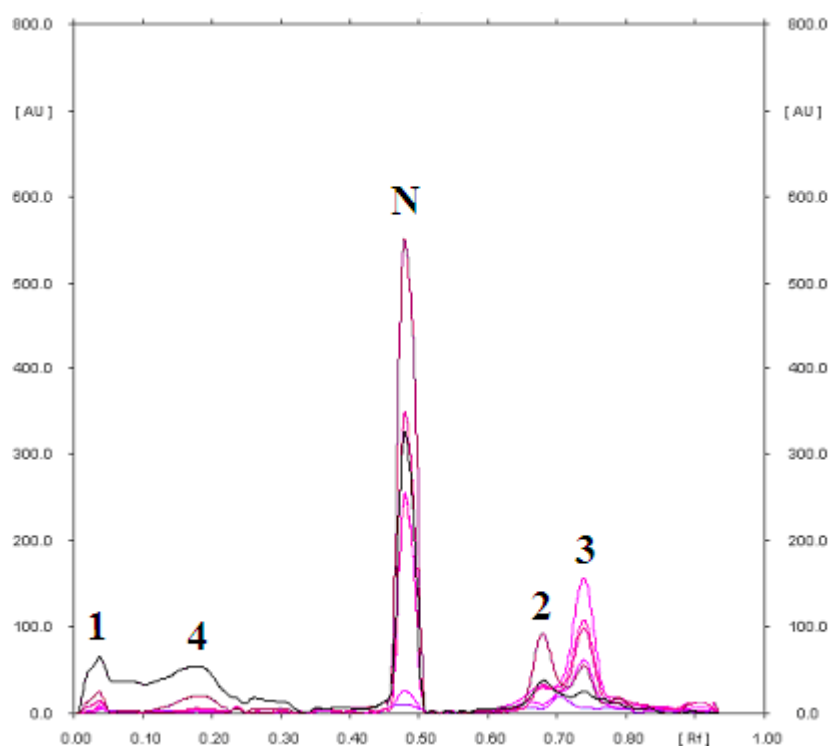

**Fig. S50.** Densitogram of naproxen (N) in solution of water at pH≈2.60 (III), which was irradiated to UV light (254 nm) for 5h (mobile phase B: AcOH - Hex - ACE, 0.10:10:10, v/v/v); 1, 2, 3,4 – degradation products of naproxen; and 2 was identified as naproxen ethyl ester.

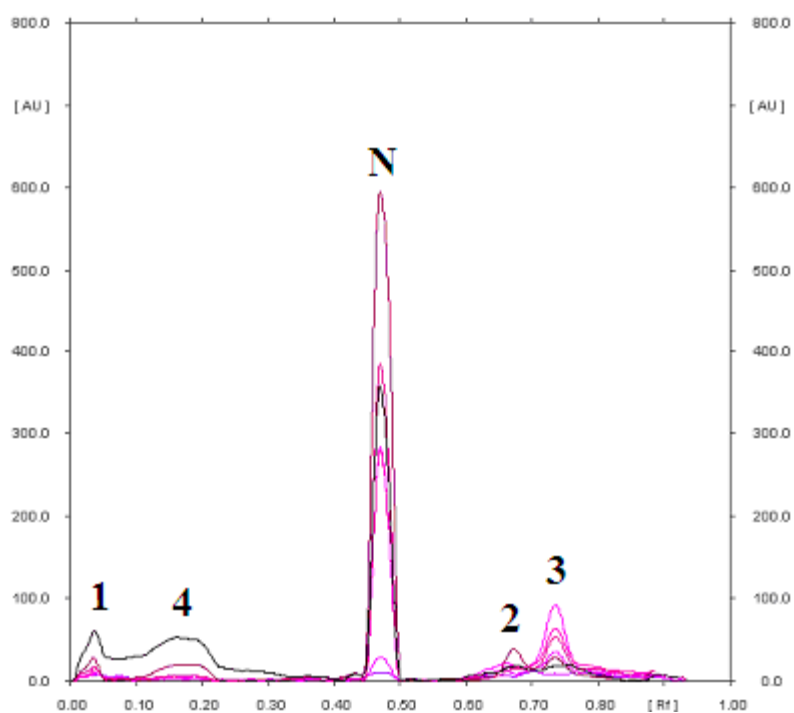

**Fig. S51.** Densitogram of naproxen (N) in solution of water at pH≈5.70 (IV), which was irradiated to UV light (254 nm) for 5h (mobile phase B: AcOH - Hex - ACE, 0.10:10:10,v/v/v); 1, 2, 3,4 – degradation products of naproxen; and 2 was identified as naproxen ethyl ester.



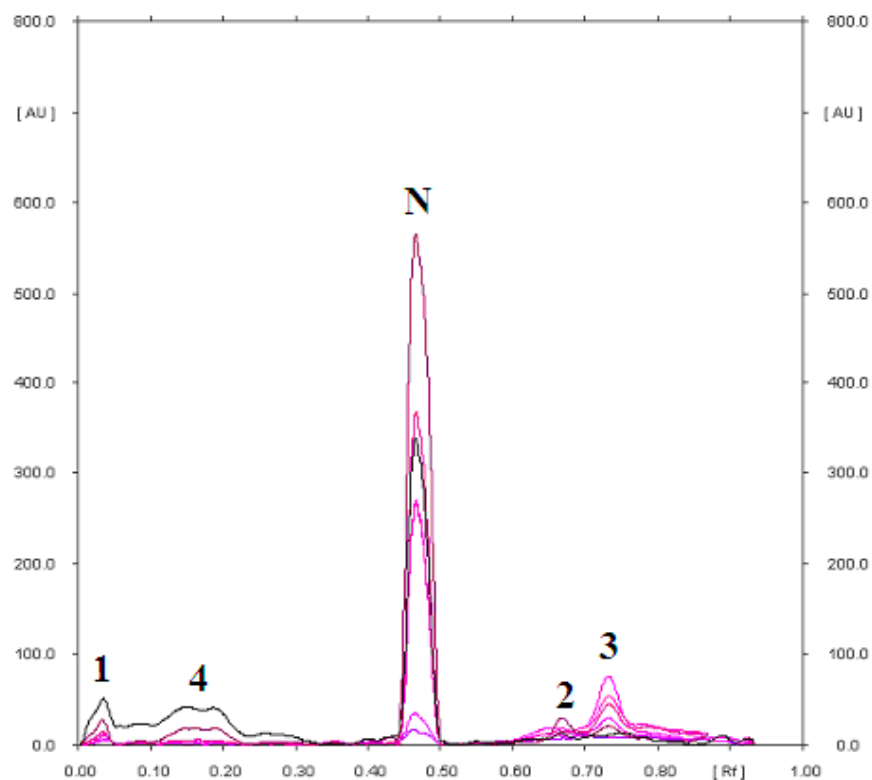

**Fig. S52.** Densitogram of naproxen (N) in solution of water at pH≈8.50 (V), which was irradiated to UV light (254 nm) for 5h (mobile phase B: AcOH - Hex - ACE, 0.10:10:10,v/v/v); 1, 2, 3,4 – degradation products of naproxen; and 2 was identified as naproxen ethyl ester.

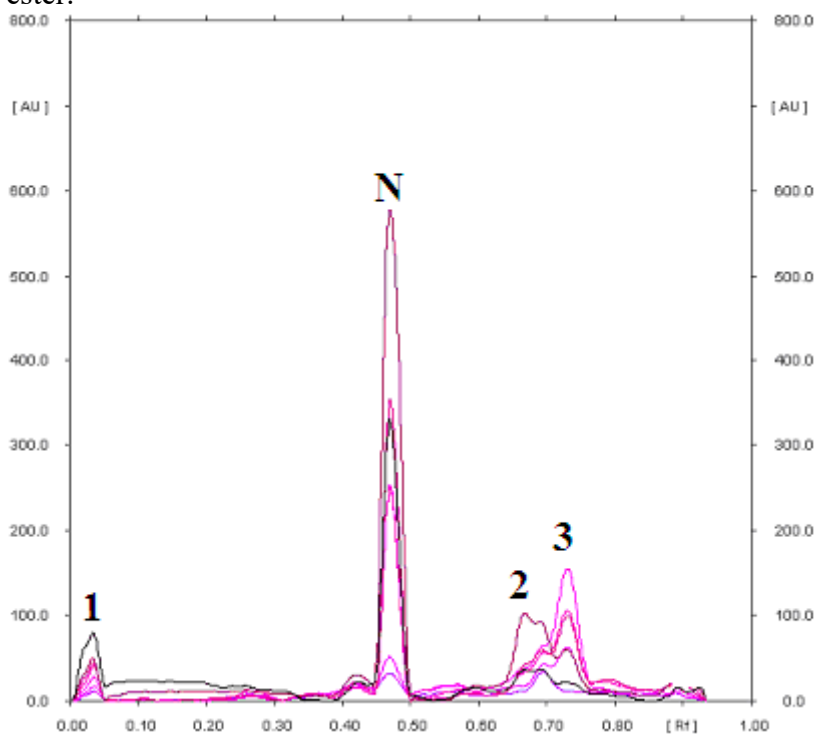

**Fig. S53.** Densitogram of naproxen (N) in hydrogen peroxide (VI), which was irradiated to UV light (254 nm) for 5h (mobile phase B: AcOH - Hex - ACE, 0.10:10:10,v/v/v); 1, 2, 3 – degradation products of naproxen; and 2 was identified as naproxen ethyl ester.

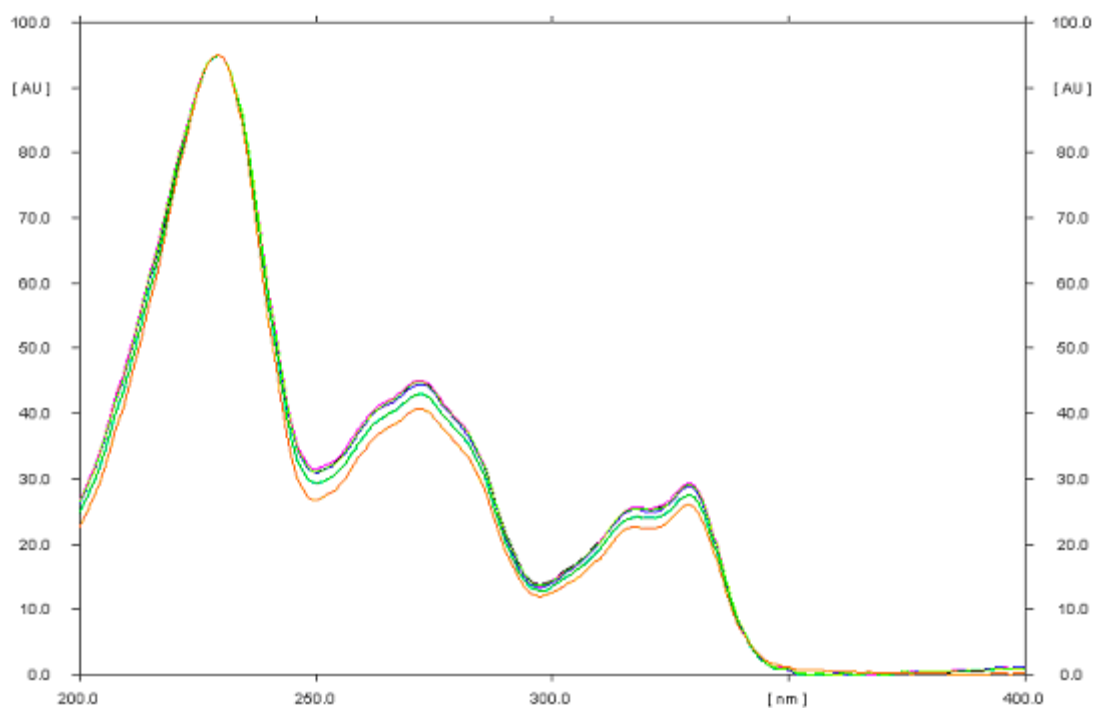

**Fig. S54.** Comparison of naproxen spectra ( $R_F = 0.50$ ), which in solutions II, III, IV, V, VI was irradiated from above for 5 hours and naproxen standard (mobile phase B: AcOH - Hex - ACE, 0.10:10:10, v/v/v).

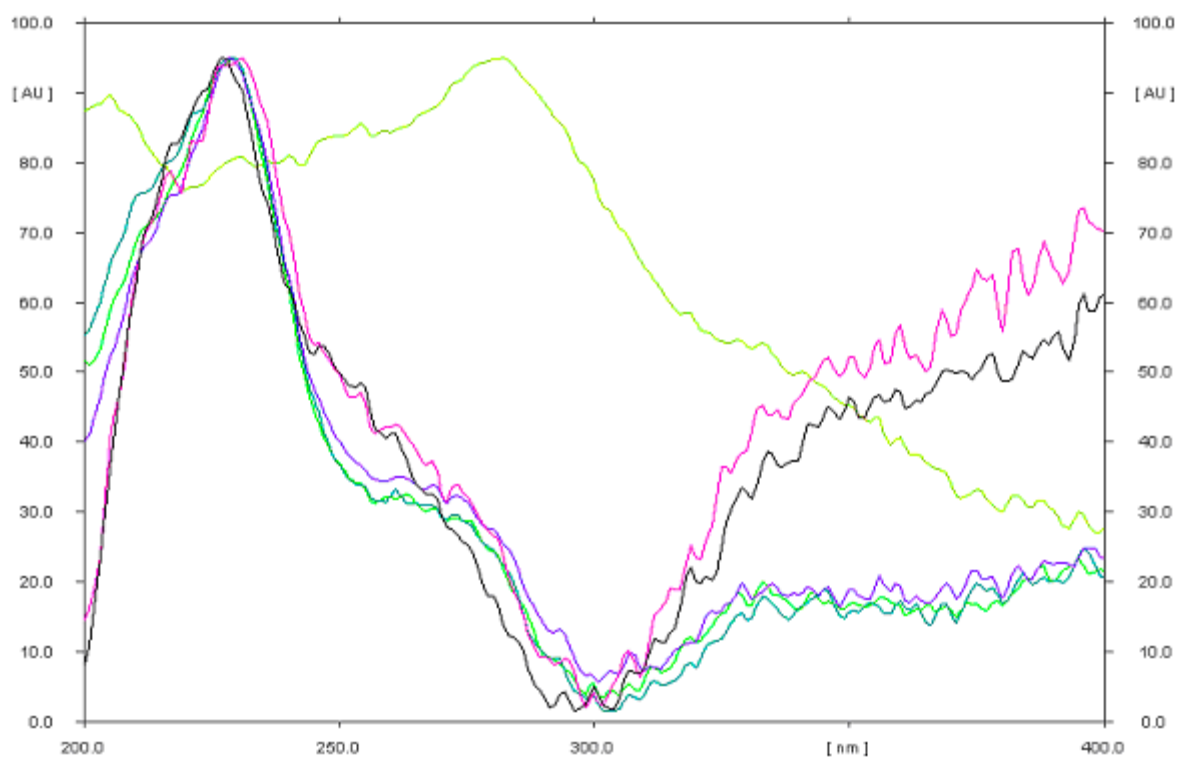

**Fig. S55.** Spectra of substance 1 with  $R_F = 0.04$  formed after irradiation of naproxen in solutions II, III, IV, V, VI for 5 h (mobile phase B: AcOH - Hex - ACE, 0.10:10:10, v/v/v).

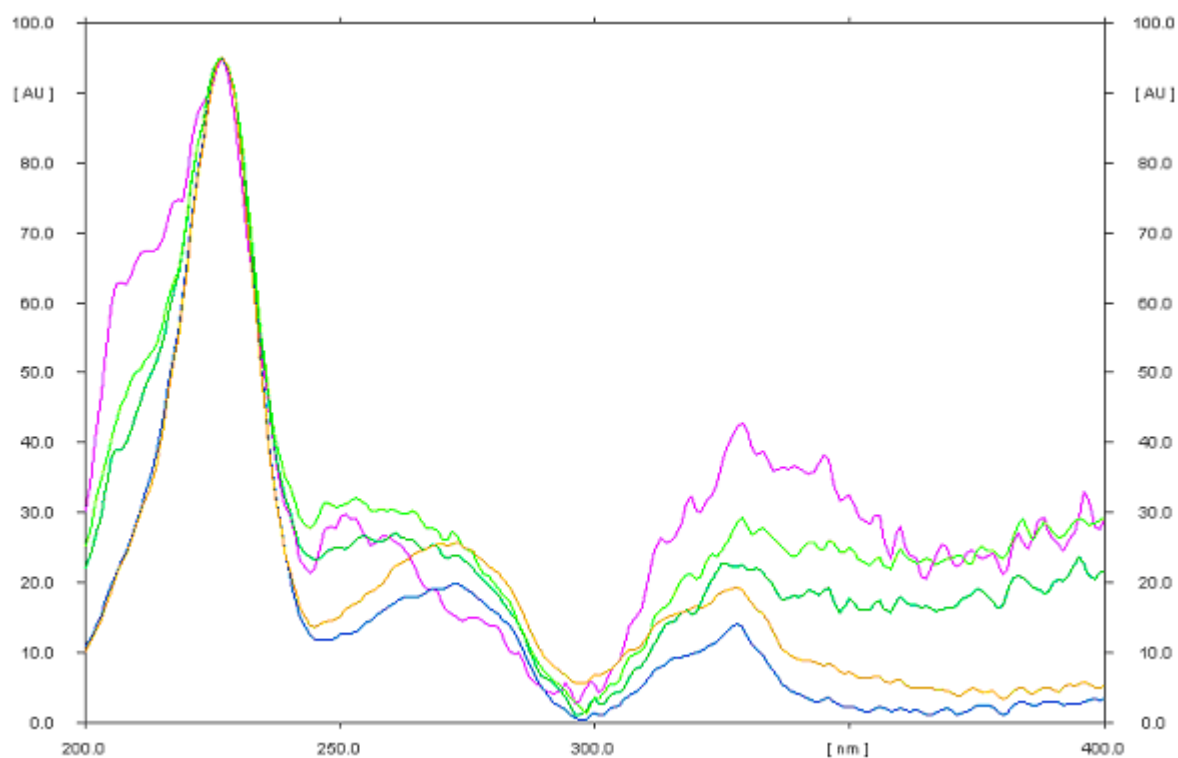

**Fig. S56.** Spectra of substance 2 (naproxen ethyl ester) with  $R_F = 0.67$  formed after irradiation of naproxen in solutions II, III, IV, V, VI for 5 h (mobile phase B: AcOH - Hex - ACE, 0.10:10:10, v/v/v).

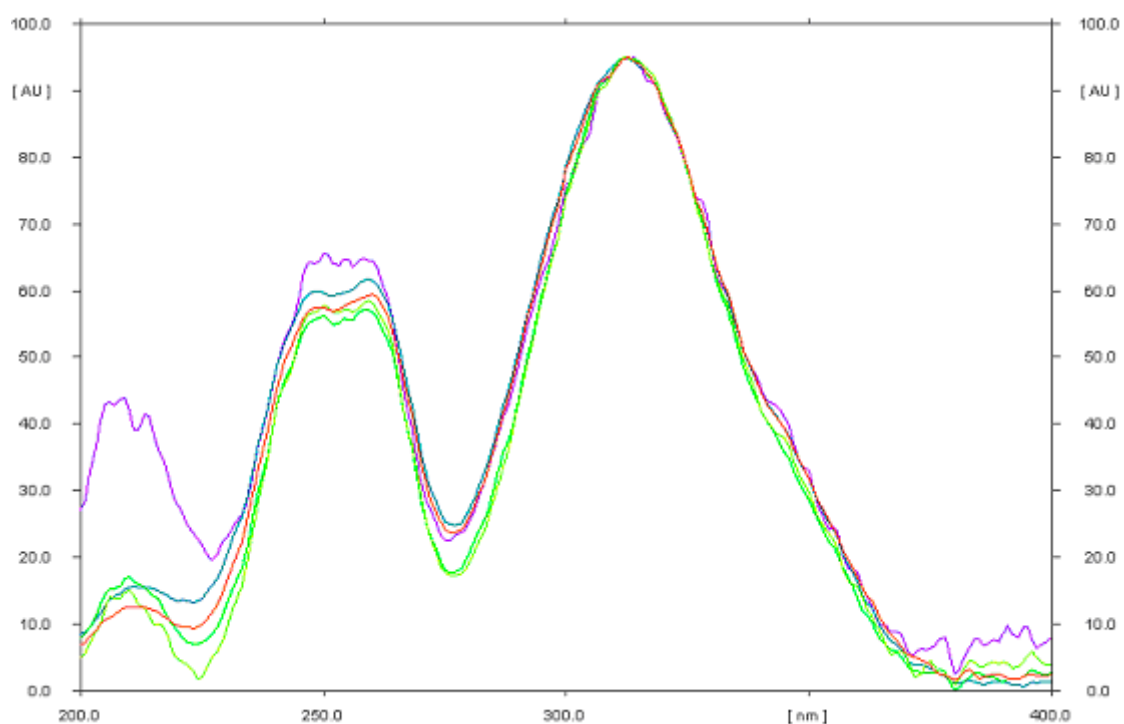

**Fig. S57.** Spectra of substance 3 with  $R_F = 0.74$  formed after irradiation of naproxen in solutions II, III, IV, V, VI for 5 h (mobile phase B: AcOH - Hex - ACE, 0.10:10:10, v/v/v).

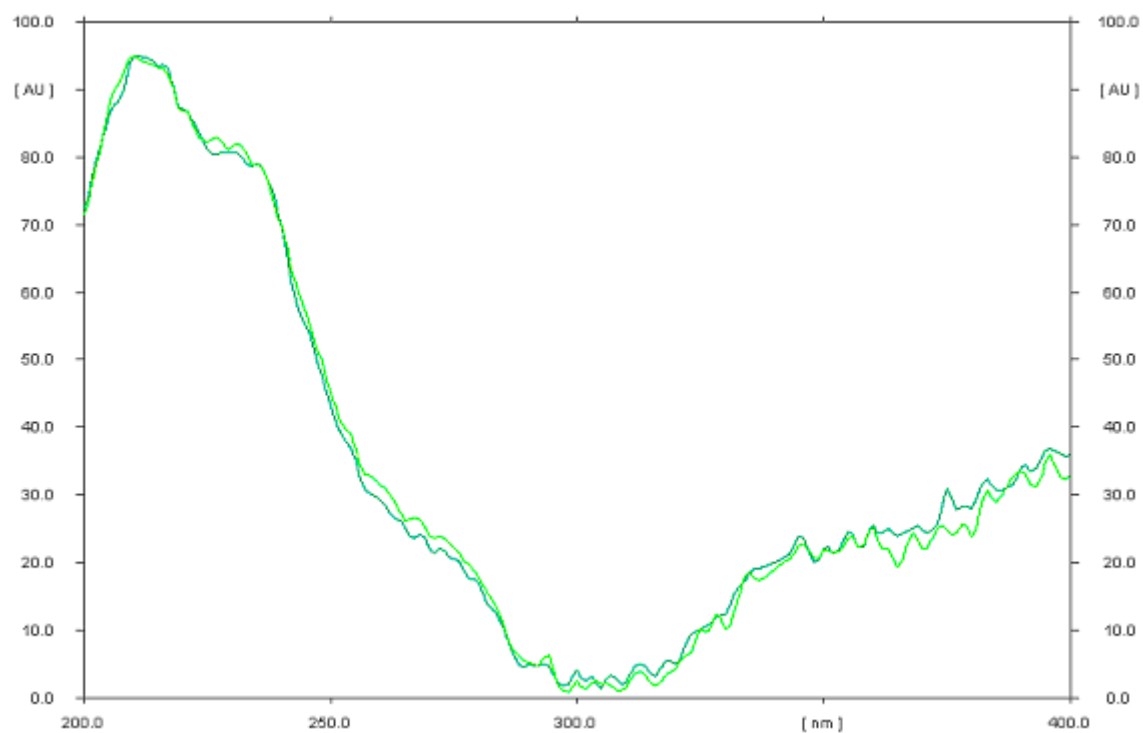

**Fig. S58.** Spectra of substance 4 with  $R_F = 0.19$  formed after irradiation of naproxen in solutions II, III, IV, V, VI for 5 h (mobile phase B: AcOH - Hex - ACE, 0.10:10:10, v/v/v).

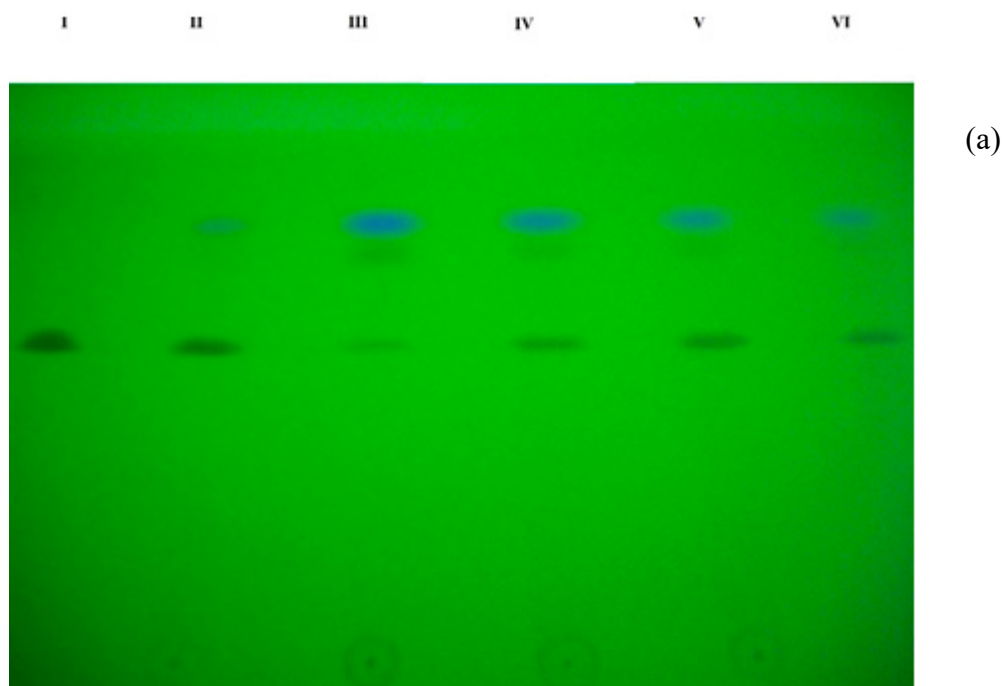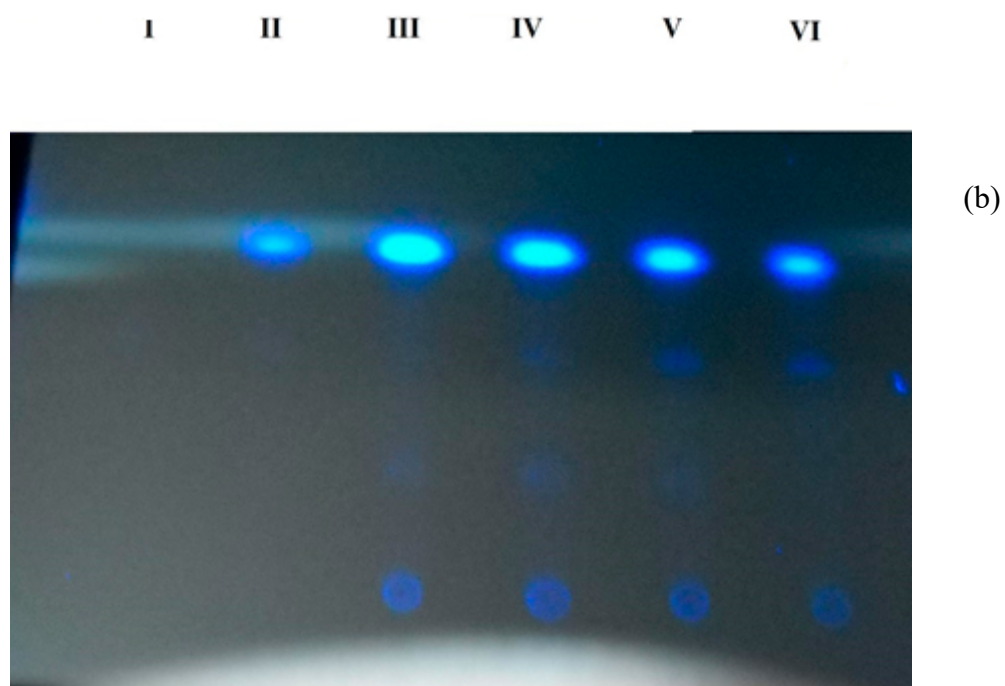

**Fig. S59.** Photographs of chromatograms, naproxen not exposed (I) and naproxen in solutions II, III, IV, V and VI irradiated for 10 h with UV radiation  $\lambda = 254\text{nm}$  taken at 254 nm (a) and 366 nm (b), after separation using a mobile phase B: AcOH - Hex - ACE, 0.10:10:10 (v/v/v).

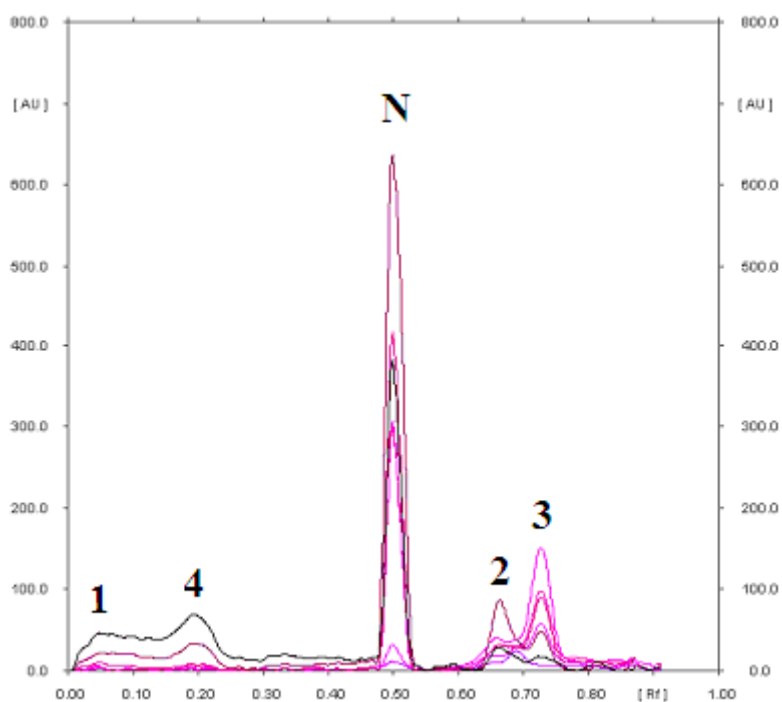

**Fig. S60.** Densitogram of naproxen (N) in solution of physiological salt (II), which was irradiated to UV light (254 nm) for 10h (mobile phase B: AcOH - Hex - ACE, 0.10:10:10, v/v/v); 1, 2, 3,4 – degradation products of naproxen; and 2 was identified as naproxen ethyl ester.

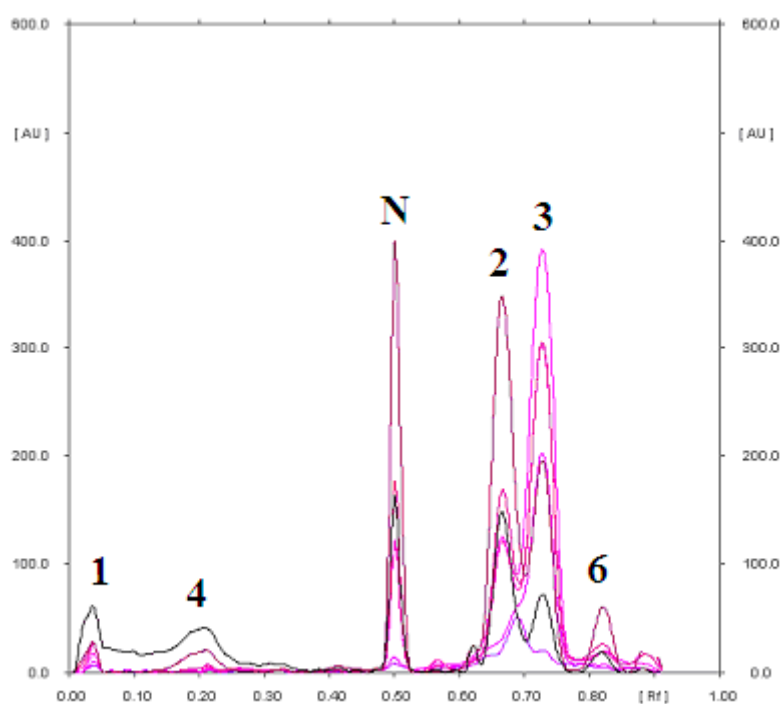

**Fig. S61.** Densitogram of naproxen (N) in solution of water at pH≈2.60 (III), which was irradiated to UV light (254 nm) for 10h (mobile phase B: AcOH - Hex - ACE, 0.10:10:10, v/v/v); 1, 2, 3,4,6 – degradation products of naproxen; and 2 was identified as naproxen ethyl ester.

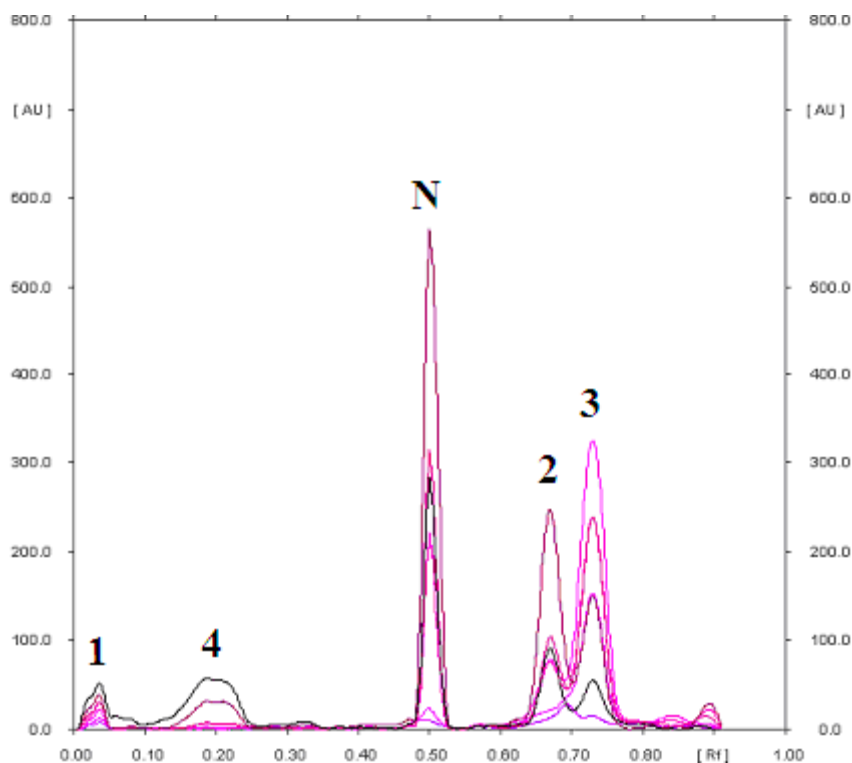

**Fig. S62.** Densitogram of naproxen (N) in solution of water at pH $\approx$ 5.70 (IV), which was irradiated to UV light (254 nm) for 10h (mobile phase B: AcOH - Hex - ACE, 0.10:10:10, v/v/v); 1, 2, 3,4 – degradation products of naproxen; and 2 was identified as naproxen ethyl ester.

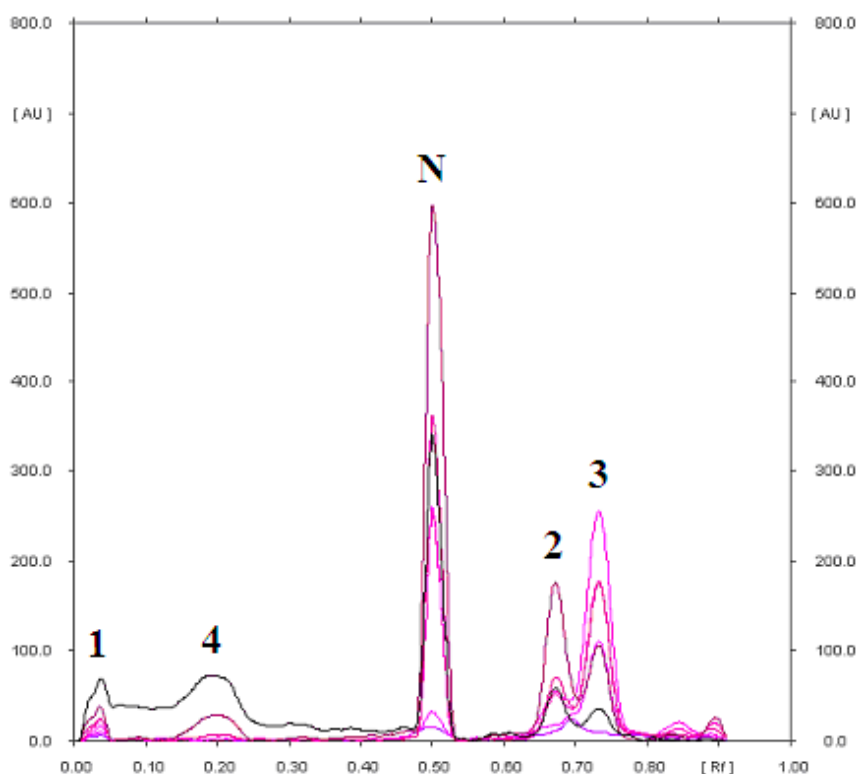

**Fig. S63.** Densitogram of naproxen (N) in solution of water at pH $\approx$ 8.50 (V), which was irradiated to UV light (254 nm) for 10h (mobile phase B: AcOH - Hex - ACE, 0.10:10:10, v/v/v); 1, 2, 3,4 – degradation products of naproxen; and 2 was identified as naproxen ethyl ester.

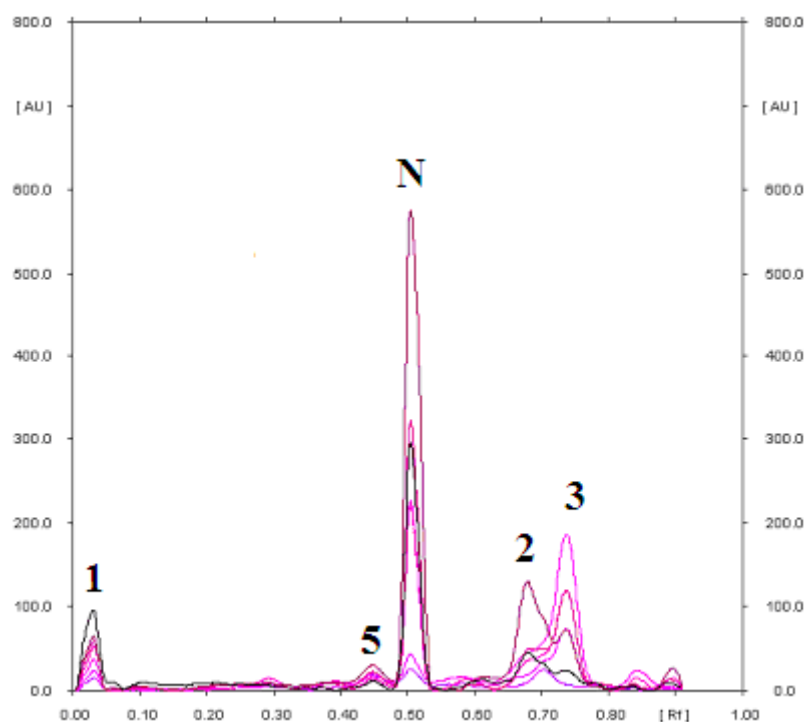

**Fig. S64.** Densitogram of naproxen (N) in hydrogen peroxide (VI), which was irradiated to UV light (254 nm) for 10h (mobile phase B: AcOH - Hex - ACE, 0.10:10:10, v/v/v); 1, 2, 3,5 – degradation products of naproxen; and 2 was identified as naproxen ethyl ester.

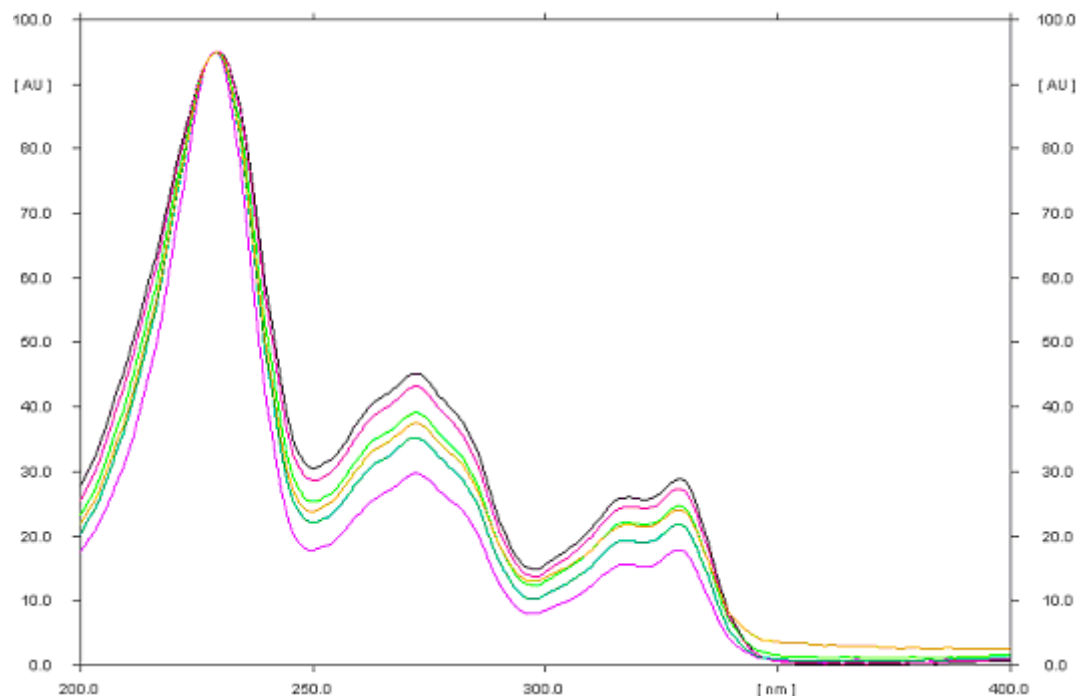

**Fig. S65.** Comparison of naproxen spectra ( $R_F = 0.50$ ), which in solutions II, III, IV, V, VI was irradiated from above for 10 h and naproxen standard (mobile phase B: AcOH - Hex - ACE, 0.10:10:10, v/v/v)).



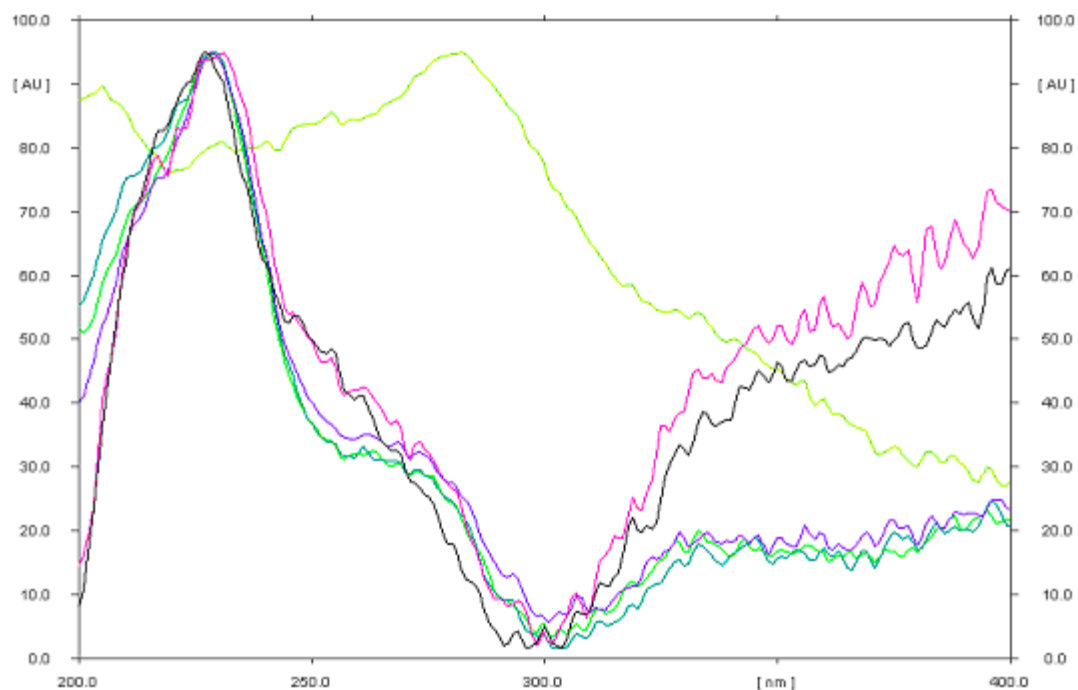

**Fig. S66.** Spectra of substance 1 with  $R_F = 0.04$  formed after irradiation of naproxen in solutions II, III, IV, V, VI for 10 h (mobile phase B: AcOH - Hex - ACE, 0.10:10:10, v/v/v)).

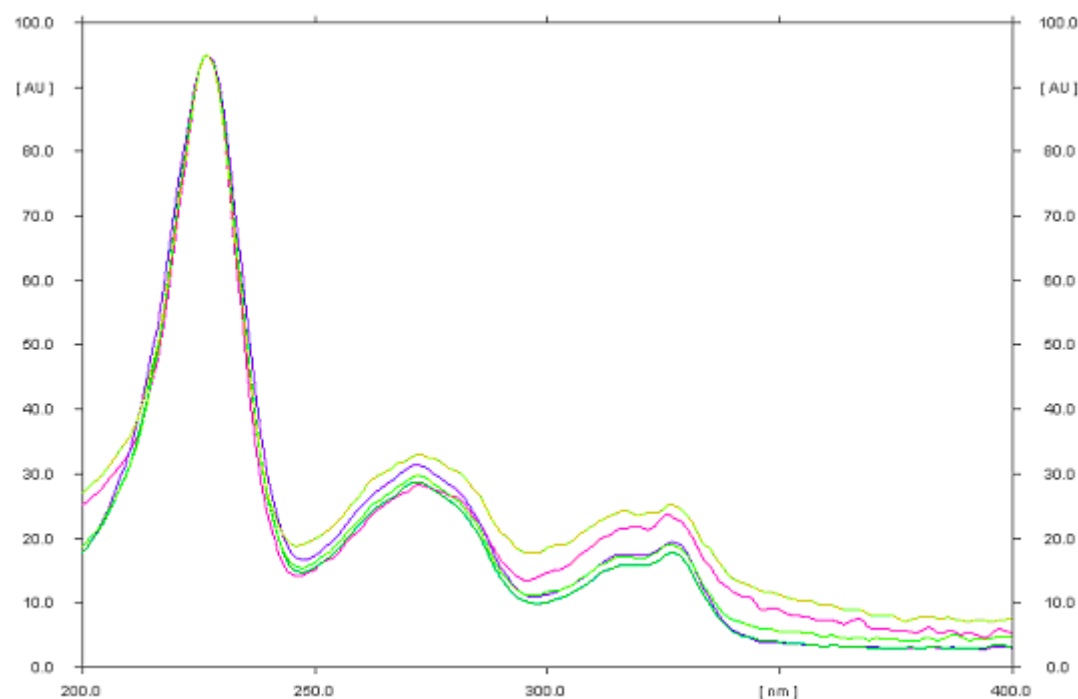

**Fig. S67.** Spectra of substance 2 (naproxen ethyl ester) with  $R_F = 0.67$  formed after irradiation of naproxen in solutions II, III, IV, V, VI for 10 h (mobile phase B: AcOH - Hex - ACE, 0.10:10:10, v/v/v)).

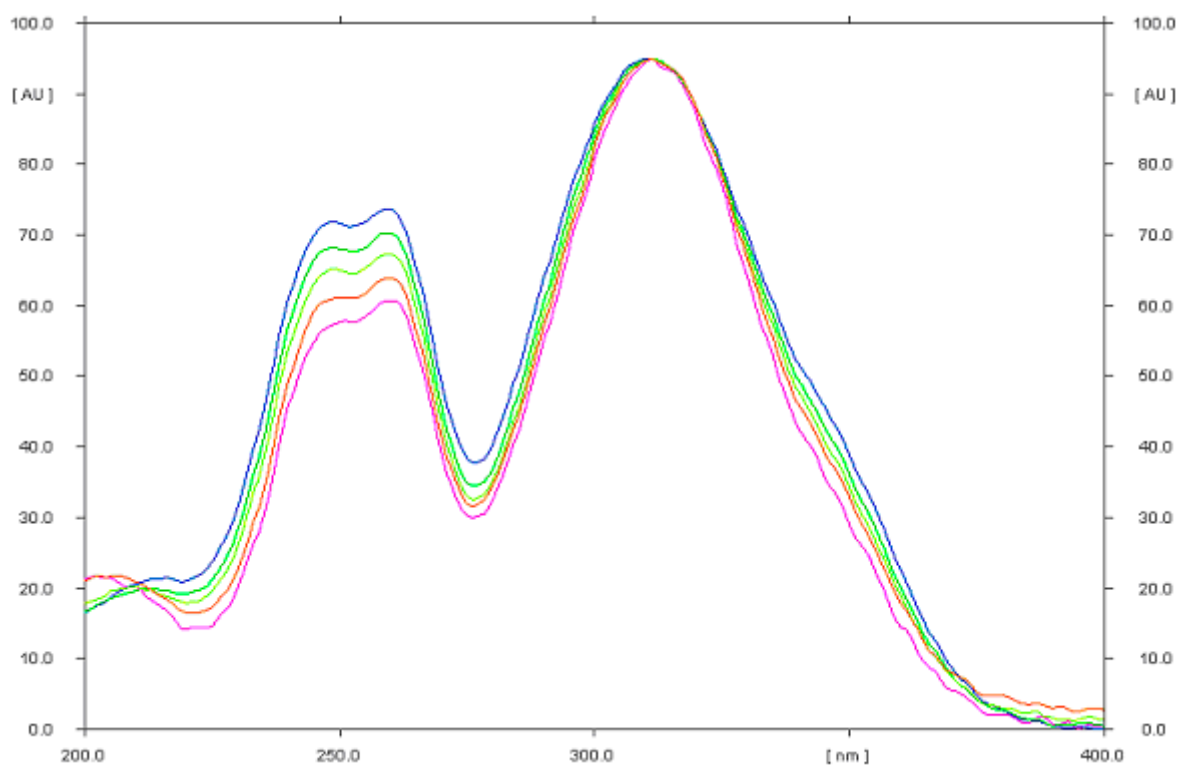

**Fig. S68.** Spectra of substance 3 with  $R_F = 0.73$  formed after irradiation of naproxen in solutions II, III, IV, V, VI for 10 h (mobile phase B: AcOH - Hex - ACE, 0.10:10:10, v/v/v).

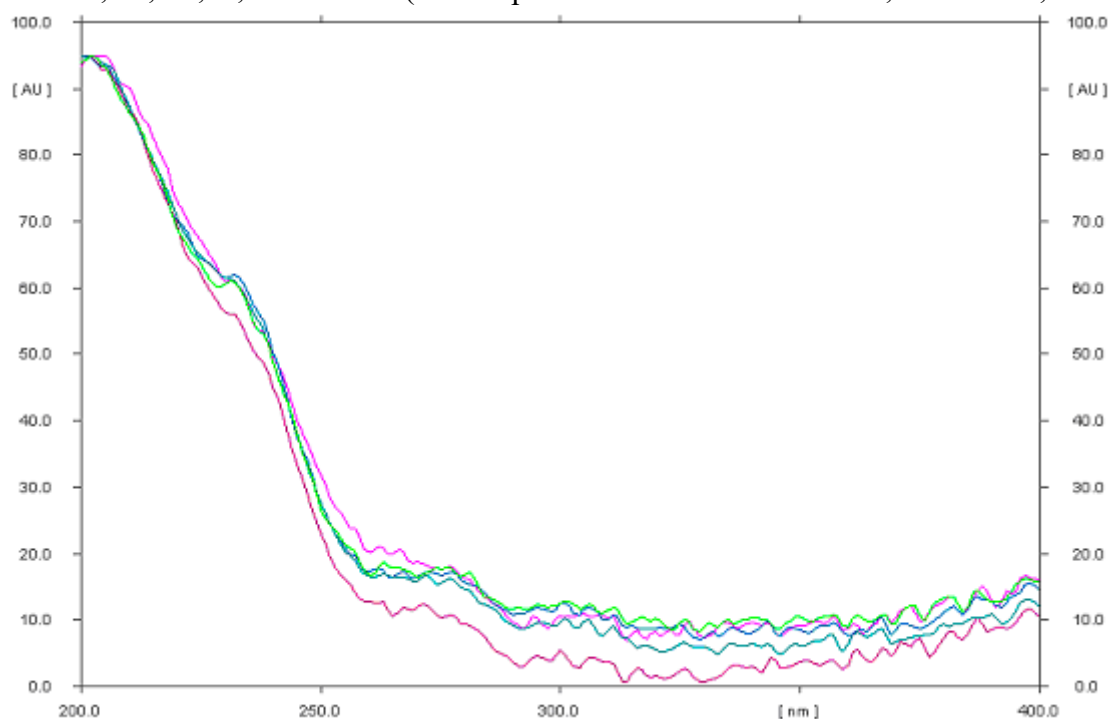

**Fig. S69.** Spectra of substance 4 with  $R_F = 0.20$  formed after irradiation of naproxen in solutions II, III, IV, V, VI for 10 h (mobile phase B: AcOH - Hex - ACE, 0.10:10:10, v/v/v).

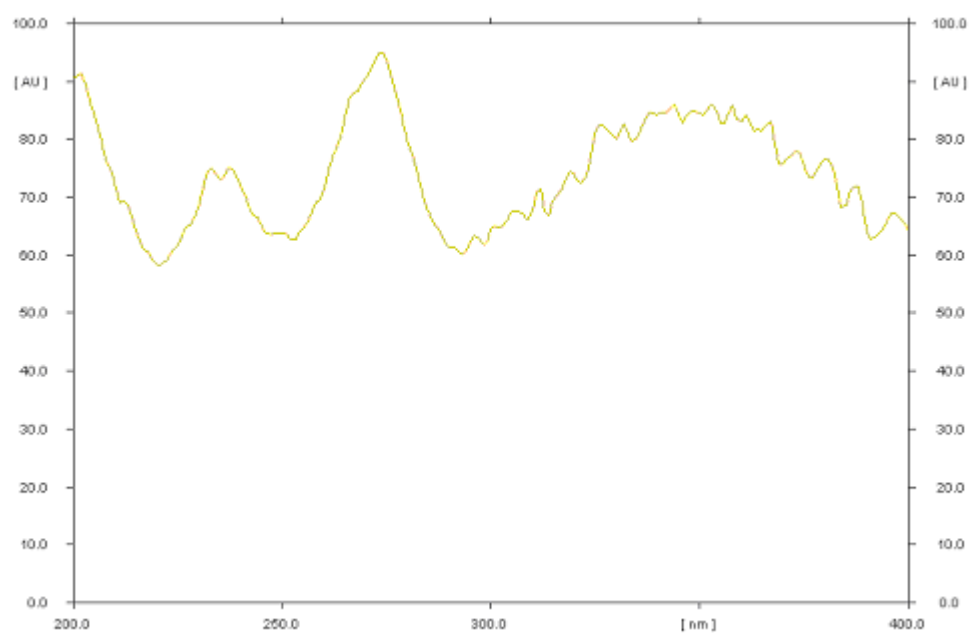

**Fig. S70.** Spectra of substance 5 with  $R_F = 0.45$  formed after irradiation of naproxen in solution VI for 10 h (mobile phase B: AcOH - Hex - ACE, 0.10:10:10, v/v/v).

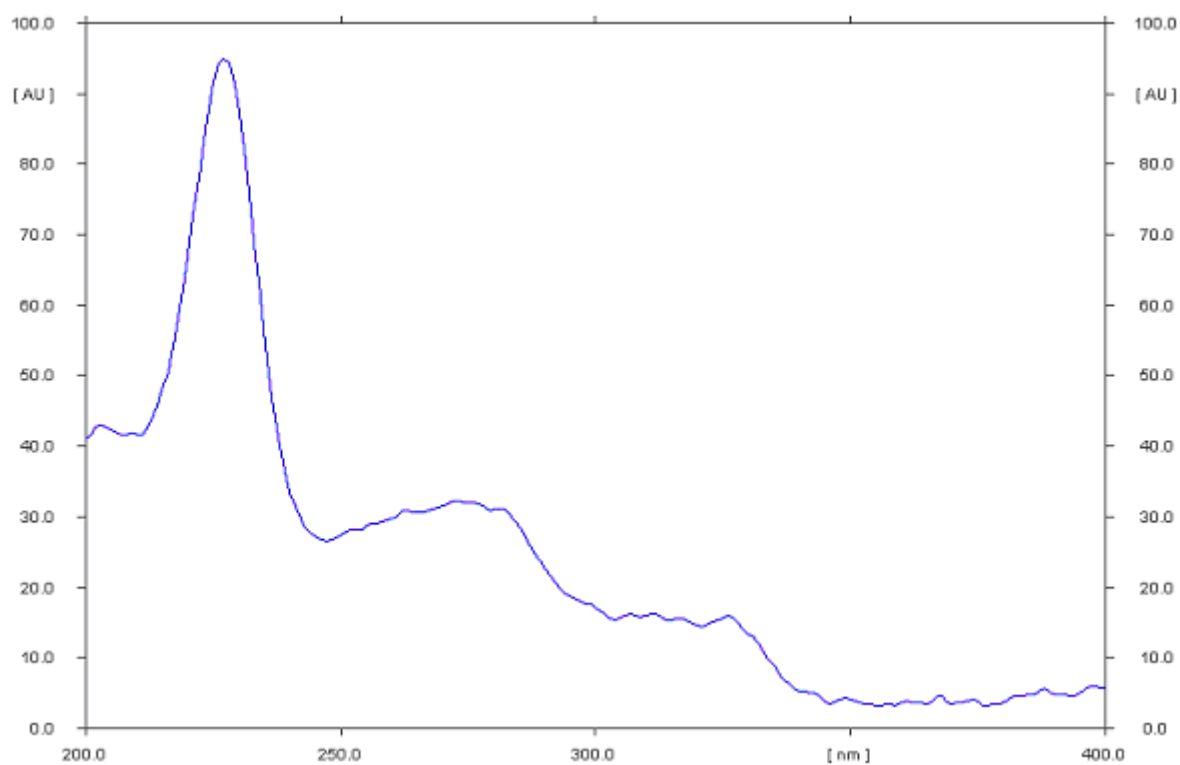

**Fig. S71.** Spectra of substance 6 with  $R_F = 0.82$  formed after irradiation of naproxen in solution III for 10 h (mobile phase B: AcOH - Hex - ACE, 0.10:10:10, v/v/v).

**Table S4.** R<sub>F</sub> values and chromatographic peak area of naproxen and its chemical transformation products formed in individual solutions irradiated from the top by UV light (254 nm), after separation using a mobile phase B: AcOH - Hex - ACE, 0.10:10:10 (v/v/v).

| Solution | Exposure time | Substance <sup>a)</sup> | R <sub>F</sub> | Chromatographic band area [AU] <sup>b)</sup> | % of band area |
|----------|---------------|-------------------------|----------------|----------------------------------------------|----------------|
| I        | 0 h           | N                       | 0.50           | 17935                                        | 100            |
|          |               | N                       | 0.49           | 14622                                        | 67.59          |
| II       | 5 h           | S1                      | 0.04           | 707                                          | 3.27           |
|          |               | S2                      | 0.69           | 975                                          | 4.51           |
|          |               | S3                      | 0.75           | 1551                                         | 7.17           |
|          |               | S4                      | 0.19           | 3777                                         | 17.46          |
|          |               | N                       | 0.50           | 14826                                        | 58.75          |
|          | 10 h          | S1                      | 0.04           | 1102                                         | 4.37           |
|          |               | S2                      | 0.66           | 2590                                         | 10.26          |
|          |               | S3                      | 0.73           | 4812                                         | 19.07          |
|          |               | S4                      | 0.19           | 1907                                         | 7.55           |
|          |               | S5                      | —              | —                                            | —              |
|          |               | S6                      | —              | —                                            | —              |
|          | 5 h           | N                       | 0.48           | 12790                                        | 51.58          |
|          |               | S1                      | 0.04           | 458                                          | 1.85           |
|          |               | S2                      | 0.68           | 2739                                         | 11.05          |
|          |               | S3                      | 0.74           | 4943                                         | 19.93          |
|          |               | S4                      | 0.19           | 3865                                         | 15.59          |
| III      | 10 h          | N                       | 0.50           | 5956                                         | 17.91          |
|          |               | S1                      | 0.03           | 936                                          | 2.81           |
|          |               | S2                      | 0.67           | 10379                                        | 31.20          |
|          |               | S3                      | 0.73           | 12967                                        | 38.98          |
|          |               | S4                      | 0.21           | 1505                                         | 4.52           |
|          |               | S5                      | —              | —                                            | —              |
|          |               | S6                      | 0.82           | 1519                                         | 4.58           |
| IV       | 5 h           | N                       | 0.47           | 14162                                        | 60.22          |
|          |               | S1                      | 0.04           | 520                                          | 2.21           |
|          |               | S2                      | 0.67           | 1216                                         | 5.17           |
|          |               | S3                      | 0.74           | 3032                                         | 12.99          |
|          |               | S4                      | 0.18           | 4586                                         | 19.50          |
|          | 10 h          | N                       | 0.50           | 10621                                        | 35.36          |
|          |               | S1                      | 0.04           | 880                                          | 2.93           |
|          |               | S2                      | 0.67           | 6568                                         | 21.87          |
|          |               | S3                      | 0.73           | 10132                                        | 33.73          |
|          |               | S4                      | 0.20           | 1836                                         | 6.11           |
|          |               | S5                      | —              | —                                            | —              |
|          |               | S6                      | —              | —                                            | —              |
| V        | 5 h           | N                       | 0.47           | 14496                                        | 74.08          |
|          |               | S1                      | 0.03           | 468                                          | 2.39           |
|          |               | S2                      | 0.67           | 795                                          | 4.06           |
|          |               | S3                      | 0.73           | 2506                                         | 12.81          |
|          |               | S4                      | 0.18           | 1304                                         | 6.66           |
|          | 10 h          | N                       | 0.50           | 13412                                        | 46.06          |
|          |               | S1                      | 0.04           | 407                                          | 1.40           |
|          |               | S2                      | 0.67           | 4817                                         | 16.54          |
|          |               | S3                      | 0.73           | 7778                                         | 26.71          |
|          |               | S4                      | 0.20           | 2705                                         | 9.29           |
|          |               | S5                      | —              | —                                            | —              |
|          |               | S6                      | —              | —                                            | —              |

|    |      |    |      |       |       |
|----|------|----|------|-------|-------|
| VI | 5 h  | N  | 0.47 | 12874 | 56.27 |
|    |      | S1 | 0.03 | 635   | 2.78  |
|    |      | S2 | 0.67 | 2829  | 12.37 |
|    |      | S3 | 0.73 | 6539  | 28.58 |
|    |      | S4 | —    | —     | —     |
|    | 10 h | N  | 0.51 | 11795 | 47.46 |
|    |      | S1 | 0.04 | 525   | 2.11  |
|    |      | S2 | 0.68 | 4720  | 19.00 |
|    |      | S3 | 0.74 | 7171  | 28.85 |
|    |      | S4 | —    | —     | —     |
|    |      | S5 | 0.45 | 641   | 2.58  |
|    |      | S6 | —    | —     | —     |

where:

<sup>a)</sup> N - naproxen

S1, S2, S3, S4, S5, S6 - products of chemical transformation of naproxen; and S2 was identified as naproxen ethyl ester

<sup>b)</sup> Area of the chromatographic band at  $\lambda_{\max}$
